# Supplementary material
Source: ML conference proceedings conference paper supplement (https://openreview.net/forum?id=I59qJ0sJ2nh)
Supplement: supplementary_material [file attachment]

## References

- [1] Pieter Abbeel and Andrew Y Ng. Apprenticeship learning via inverse reinforcement learning. In *Proceedings of the twenty-first international conference on Machine learning*, page 1, 2004.
- [2] Joshua Achiam. Spinning Up in Deep Reinforcement Learning. 2018.
- [3] Riad Akrou, Marc Schoenauer, and Michele Sebag. Preference-based policy learning. In *Joint European Conference on Machine Learning and Knowledge Discovery in Databases*, pages 12–27. Springer, 2011.
- [4] Syed Mumtaz Ali and Samuel D Silvey. A general class of coefficients of divergence of one distribution from another. *Journal of the Royal Statistical Society: Series B (Methodological)*, 28(1):131–142, 1966.
- [5] Oleg Arenz and Gerhard Neumann. Non-adversarial imitation learning and its connections to adversarial methods. *arXiv preprint arXiv:2008.03525*, 2020.
- [6] Tamer Başar and Geert Jan Olsder. *Dynamic noncooperative game theory*. SIAM, 1998.
- [7] Marc G Bellemare, Georg Ostrovski, Arthur Guez, Philip Thomas, and Rémi Munos. Increasing the action gap: New operators for reinforcement learning. In *Proceedings of the AAAI Conference on Artificial Intelligence*, volume 30, 2016.
- [8] Erdem Bıyık, Dylan P Losey, Malayandi Palan, Nicholas C Landolfi, Gleb Shevchuk, and Dorsa Sadigh. Learning reward functions from diverse sources of human feedback: Optimally integrating demonstrations and preferences. *The International Journal of Robotics Research*, page 02783649211041652, 2021.
- [9] Daniel Brown, Russell Coleman, Ravi Srinivasan, and Scott Niekum. Safe imitation learning via fast bayesian reward inference from preferences. In *International Conference on Machine Learning*, pages 1165–1177. PMLR, 2020.
- [10] Daniel S. Brown, Wonjoon Goo, Prabhat Nagarajan, and Scott Niekum. Extrapolating beyond suboptimal demonstrations via inverse reinforcement learning from observations. *ArXiv*, abs/1904.06387, 2019.
- [11] Daniel S Brown, Wonjoon Goo, and Scott Niekum. Better-than-demonstrator imitation learning via automatically-ranked demonstrations. In *Conference on robot learning*, pages 330–359. PMLR, 2020.
- [12] Nicolo Cesa-Bianchi and Gábor Lugosi. *Prediction, learning, and games*. Cambridge university press, 2006.
- [13] Letian Chen, Rohan Paleja, and Matthew Gombolay. Learning from suboptimal demonstration via self-supervised reward regression. *arXiv preprint arXiv:2010.11723*, 2020.
- [14] Paul Christiano, Jan Leike, Tom B Brown, Miljan Martic, Shane Legg, and Dario Amodei. Deep reinforcement learning from human preferences. *arXiv preprint arXiv:1706.03741*, 2017.
- [15] Imre Csiszár. Information-type measures of difference of probability distributions and indirect observation. *studia scientiarum Mathematicarum Hungarica*, 2:229–318, 1967.
- [16] Ashley Edwards, Himanshu Sahni, Yannick Schroecker, and Charles Isbell. Imitating latent policies from observation. In *International Conference on Machine Learning*, pages 1755–1763. PMLR, 2019.
- [17] Tanner Fiez, Benjamin Chasnov, and Lillian J Ratliff. Convergence of learning dynamics in stackelberg games. *arXiv preprint arXiv:1906.01217*, 2019.

- [18] Chelsea Finn, Sergey Levine, and Pieter Abbeel. Guided cost learning: Deep inverse optimal control via policy optimization. In *International conference on machine learning*, pages 49–58. PMLR, 2016.
- [19] Justin Fu, Aviral Kumar, Ofir Nachum, George Tucker, and Sergey Levine. D4rl: Datasets for deep data-driven reinforcement learning. *arXiv preprint arXiv:2004.07219*, 2020.
- [20] Justin Fu, Katie Luo, and Sergey Levine. Learning robust rewards with adversarial inverse reinforcement learning. *arXiv preprint arXiv:1710.11248*, 2017.
- [21] Divyansh Garg, Shuvam Chakraborty, Chris Cundy, Jiaming Song, and Stefano Ermon. Iq-learn: Inverse soft-q learning for imitation. *Advances in Neural Information Processing Systems*, 34, 2021.
- [22] Seyed Kamyar Seyed Ghasemipour, Richard Zemel, and Shixiang Gu. A divergence minimization perspective on imitation learning methods. In *Conference on Robot Learning*, pages 1259–1277. PMLR, 2020.
- [23] Gustavo Gilardi. On the minimum f-divergence for given total variation. *Comptes Rendus Mathématique - C R MATH*, 343:763–766, 12 2006.
- [24] Xavier Glorot and Yoshua Bengio. Understanding the difficulty of training deep feedforward neural networks. In *Proceedings of the thirteenth international conference on artificial intelligence and statistics*, pages 249–256. JMLR Workshop and Conference Proceedings, 2010.
- [25] Hongyu Guo, Yongyi Mao, and Richong Zhang. Mixup as locally linear out-of-manifold regularization. In *Proceedings of the AAAI Conference on Artificial Intelligence*, volume 33, pages 3714–3722, 2019.
- [26] Tuomas Haarnoja, Aurick Zhou, Pieter Abbeel, and Sergey Levine. Soft actor-critic: Off-policy maximum entropy deep reinforcement learning with a stochastic actor. In *International conference on machine learning*, pages 1861–1870. PMLR, 2018.
- [27] Peter Henderson, Riashat Islam, Philip Bachman, Joelle Pineau, Doina Precup, and David Meger. Deep reinforcement learning that matters. In *Proceedings of the AAAI conference on artificial intelligence*, volume 32, 2018.
- [28] Jonathan Ho and Stefano Ermon. Generative adversarial imitation learning. *Advances in neural information processing systems*, 29:4565–4573, 2016.
- [29] Wassily Hoeffding. Probability inequalities for sums of bounded random variables. In *The collected works of Wassily Hoeffding*, pages 409–426. Springer, 1994.
- [30] Borja Ibarz, Jan Leike, Tobias Pohlen, Geoffrey Irving, Shane Legg, and Dario Amodei. Reward learning from human preferences and demonstrations in atari. *arXiv preprint arXiv:1811.06521*, 2018.
- [31] Rishabh Iyer and Jeff Bilmes. The submodular bregman and lovász-bregman divergences with applications: Extended version. Citeseer, 2012.
- [32] Hong Jun Jeon, Smitha Milli, and Anca Dragan. Reward-rational (implicit) choice: A unifying formalism for reward learning. *Advances in Neural Information Processing Systems*, 33:4415–4426, 2020.
- [33] Sham Kakade and John Langford. Approximately optimal approximate reinforcement learning. In *In Proc. 19th International Conference on Machine Learning*. Citeseer, 2002.
- [34] Liyiming Ke, Sanjiban Choudhury, Matt Barnes, Wen Sun, Gilwoo Lee, and Siddhartha Srinivasa. Imitation learning as f-divergence minimization. In *Algorithmic Foundations of Robotics XIV: Proceedings of the Fourteenth Workshop on the Algorithmic Foundations of Robotics 14*, pages 313–329. Springer International Publishing, 2021.

- [35] Michael Kearns and Satinder Singh. Finite-sample convergence rates for q-learning and indirect algorithms. *Advances in neural information processing systems*, 11, 1998.
- [36] Rahul Kidambi, Jonathan Chang, and Wen Sun. Mobile: Model-based imitation learning from observation alone. *Advances in Neural Information Processing Systems*, 34, 2021.
- [37] Ilya Kostrikov, Kumar Krishna Agrawal, Debidatta Dwibedi, Sergey Levine, and Jonathan Tompson. Discriminator-actor-critic: Addressing sample inefficiency and reward bias in adversarial imitation learning. *arXiv preprint arXiv:1809.02925*, 2018.
- [38] Ilya Kostrikov, Ofir Nachum, and Jonathan Tompson. Imitation learning via off-policy distribution matching. *arXiv preprint arXiv:1912.05032*, 2019.
- [39] Victoria Krakovna. Specification gaming examples in ai. Available at *vkakovna.wordpress.com*, 2018.
- [40] Minae Kwon, Erdem Biyik, Aditi Talati, Karan Bhasin, Dylan P Losey, and Dorsa Sadigh. When humans aren’t optimal: Robots that collaborate with risk-aware humans. In *2020 15th ACM/IEEE International Conference on Human-Robot Interaction (HRI)*, pages 43–52. IEEE, 2020.
- [41] Sergey Levine, Aviral Kumar, George Tucker, and Justin Fu. Offline reinforcement learning: Tutorial, review, and perspectives on open problems. *arXiv preprint arXiv:2005.01643*, 2020.
- [42] Friedrich Liese and Igor Vajda. On divergences and informations in statistics and information theory. *IEEE Transactions on Information Theory*, 52(10):4394–4412, 2006.
- [43] Fangchen Liu, Zhan Ling, Tongzhou Mu, and Hao Su. State alignment-based imitation learning. *arXiv preprint arXiv:1911.10947*, 2019.
- [44] Andrew Y Ng, Stuart J Russell, et al. Algorithms for inverse reinforcement learning. In *Icml*, volume 1, page 2, 2000.
- [45] Tianwei Ni, Harshit Sikchi, Yufei Wang, Tejus Gupta, Lisa Lee, and Benjamin Eysenbach. f-irl: Inverse reinforcement learning via state marginal matching. *arXiv preprint arXiv:2011.04709*, 2020.
- [46] Manu Orsini, Anton Raichuk, Léonard Hussenot, Damien Vincent, Robert Dadashi, Sertan Girgin, Matthieu Geist, Olivier Bachem, Olivier Pietquin, and Marcin Andrychowicz. What matters for adversarial imitation learning? *Advances in Neural Information Processing Systems*, 34, 2021.
- [47] Malayandi Palan, Nicholas C Landolfi, Gleb Shevchuk, and Dorsa Sadigh. Learning reward functions by integrating human demonstrations and preferences. *arXiv preprint arXiv:1906.08928*, 2019.
- [48] Dean A Pomerleau. Efficient training of artificial neural networks for autonomous navigation. *Neural computation*, 3(1):88–97, 1991.
- [49] Martin L Puterman. *Markov decision processes: discrete stochastic dynamic programming*. John Wiley & Sons, 2014.
- [50] Aravind Rajeswaran, Vikash Kumar, Abhishek Gupta, Giulia Vezzani, John Schulman, Emanuel Todorov, and Sergey Levine. Learning complex dexterous manipulation with deep reinforcement learning and demonstrations. *arXiv preprint arXiv:1709.10087*, 2017.
- [51] Aravind Rajeswaran, Igor Mordatch, and Vikash Kumar. A game theoretic framework for model based reinforcement learning. In *ICML*, 2020.

- [52] Siddharth Reddy, Anca D Dragan, and Sergey Levine. Sqil: Imitation learning via reinforcement learning with sparse rewards. *arXiv preprint arXiv:1905.11108*, 2019.
- [53] Alfréd Rényi. On measures of entropy and information. In *Proceedings of the Fourth Berkeley Symposium on Mathematical Statistics and Probability, Volume 1: Contributions to the Theory of Statistics*, pages 547–561. University of California Press, 1961.
- [54] Stéphane Ross, Geoffrey Gordon, and Drew Bagnell. A reduction of imitation learning and structured prediction to no-regret online learning. In *Proceedings of the fourteenth international conference on artificial intelligence and statistics*, pages 627–635. JMLR Workshop and Conference Proceedings, 2011.
- [55] Dorsa Sadigh, Anca D Dragan, Shankar Sastry, and Sanjit A Seshia. Active preference-based learning of reward functions. 2017.
- [56] Florian Schäfer and Anima Anandkumar. Competitive gradient descent. *arXiv preprint arXiv:1905.12103*, 2019.
- [57] Shai Shalev-Shwartz and Shai Ben-David. *Understanding machine learning: From theory to algorithms*. Cambridge university press, 2014.
- [58] Wen Sun, Anirudh Vemula, Byron Boots, and Drew Bagnell. Provably efficient imitation learning from observation alone. In *International conference on machine learning*, pages 6036–6045. PMLR, 2019.
- [59] Richard S Sutton and Andrew G Barto. *Reinforcement learning: An introduction*. MIT press, 2018.
- [60] Gokul Swamy, Sanjiban Choudhury, J Andrew Bagnell, and Steven Wu. Of moments and matching: A game-theoretic framework for closing the imitation gap. In *International Conference on Machine Learning*, pages 10022–10032. PMLR, 2021.
- [61] Faraz Torabi, Garrett Warnell, and Peter Stone. Behavioral cloning from observation. *arXiv preprint arXiv:1805.01954*, 2018.
- [62] Faraz Torabi, Garrett Warnell, and Peter Stone. Generative adversarial imitation from observation. *arXiv preprint arXiv:1807.06158*, 2018.
- [63] Faraz Torabi, Garrett Warnell, and Peter Stone. Recent advances in imitation learning from observation. *arXiv preprint arXiv:1905.13566*, 2019.
- [64] Igor Vajda. Note on discrimination information and variation (corresp.). *IEEE Transactions on Information Theory*, 16(6):771–773, 1970.
- [65] Aaron Wilson, Alan Fern, and Prasad Tadepalli. A bayesian approach for policy learning from trajectory preference queries. *Advances in neural information processing systems*, 25:1133–1141, 2012.
- [66] Tian Xu, Ziniu Li, and Yang Yu. Error bounds of imitating policies and environments for reinforcement learning. *IEEE Transactions on Pattern Analysis and Machine Intelligence*, 2021.
- [67] Chao Yang, Xiaojian Ma, Wenbing Huang, Fuchun Sun, Huaping Liu, Junzhou Huang, and Chuang Gan. Imitation learning from observations by minimizing inverse dynamics disagreement. *arXiv preprint arXiv:1910.04417*, 2019.
- [68] Hongyi Zhang, Moustapha Cisse, Yann N Dauphin, and David Lopez-Paz. mixup: Beyond empirical risk minimization. *arXiv preprint arXiv:1710.09412*, 2017.
- [69] Liyuan Zheng, Tanner Fiez, Zane Alumbaugh, Benjamin Chasnov, and Lillian J Ratliff. Stackelberg actor-critic: Game-theoretic reinforcement learning algorithms. *arXiv preprint arXiv:2109.12286*, 2021.

- 547 [70] Yuke Zhu, Josiah Wong, Ajay Mandlekar, and Roberto Martín-Martín. robosuite: A modular  
548 simulation framework and benchmark for robot learning. *arXiv preprint arXiv:2009.12293*,  
549 2020.
- 550 [71] Zhuangdi Zhu, Kaixiang Lin, Bo Dai, and Jiayu Zhou. Off-policy imitation learning from  
551 observations. *Advances in Neural Information Processing Systems*, 33, 2020.
- 552 [72] Brian D Ziebart, Andrew L Maas, J Andrew Bagnell, Anind K Dey, et al. Maximum entropy  
553 inverse reinforcement learning. In *Aaai*, volume 8, pages 1433–1438. Chicago, IL, USA, 2008.

## Checklist

### 1. For all authors...

- (a) Do the main claims made in the abstract and introduction accurately reflect the paper's contributions and scope? [\[Yes\]](#)
- (b) Did you describe the limitations of your work? [\[Yes\]](#) See section 6
- (c) Did you discuss any potential negative societal impacts of your work? [\[Yes\]](#) See section 6
- (d) Have you read the ethics review guidelines and ensured that your paper conforms to them? [\[Yes\]](#)

### 2. If you are including theoretical results...

- (a) Did you state the full set of assumptions of all theoretical results? [\[Yes\]](#)
- (b) Did you include complete proofs of all theoretical results? [\[Yes\]](#) See Appendix A

### 3. If you ran experiments...

- (a) Did you include the code, data, and instructions needed to reproduce the main experimental results (either in the supplemental material or as a URL)? [\[Yes\]](#) See supplementary material
- (b) Did you specify all the training details (e.g., data splits, hyperparameters, how they were chosen)? [\[Yes\]](#) See Appendix C
- (c) Did you report error bars (e.g., with respect to the random seed after running experiments multiple times)? [\[Yes\]](#)
- (d) Did you include the total amount of compute and the type of resources used (e.g., type of GPUs, internal cluster, or cloud provider)? [\[Yes\]](#) See Appendix C

### 4. If you are using existing assets (e.g., code, data, models) or curating/releasing new assets...

- (a) If your work uses existing assets, did you cite the creators? [\[Yes\]](#)
- (b) Did you mention the license of the assets? [\[Yes\]](#) See Appendix C
- (c) Did you include any new assets either in the supplemental material or as a URL? [\[N/A\]](#)
- (d) Did you discuss whether and how consent was obtained from people whose data you're using/curating? [\[N/A\]](#)
- (e) Did you discuss whether the data you are using/curating contains personally identifiable information or offensive content? [\[N/A\]](#)

### 5. If you used crowdsourcing or conducted research with human subjects...

- (a) Did you include the full text of instructions given to participants and screenshots, if applicable? [\[N/A\]](#)
- (b) Did you describe any potential participant risks, with links to Institutional Review Board (IRB) approvals, if applicable? [\[N/A\]](#)
- (c) Did you include the estimated hourly wage paid to participants and the total amount spent on participant compensation? [\[N/A\]](#)

Our code is available in the supplementary material to facilitate reproducibility.

## A Theory

We aim to show that `rank-game` has an equilibrium that bounds the  $f$ -divergence between the agent and the expert (Theorem A.1) in the imitation learning setting. For imitation learning, we have the vanilla implicit ranking  $\rho^{agent} \preceq \rho^E$ , between the behavior of agent and the expert. Later, we show that, the bounded  $f$ -divergence can be used to bound the performance gap with the expert under the expert’s unknown reward function using a solution to Vajda’s tight lower bound (Corollary A.1.1). Our proof proceeds by first showing that minimizing the empirical ranking loss produces a reward function that is close to the reward function obtained by the true ranking loss. Then, we show that even under the presence of policy optimization errors maximizing the obtained reward function will lead to a bounded  $f$ -divergence with the expert.

**Theorem A.1.** (*Performance of the rank-game equilibrium pair*) Consider an equilibrium of the imitation rank-game  $(\hat{\pi}, \hat{R})$ , such that  $\hat{R}$  minimizes the empirical ranking-loss for dataset  $D^{\hat{\pi}} = \{(\rho^{\hat{\pi}}, \rho^E)\}$  and the ranking-loss generalization error is bounded by  $\epsilon'_r = 2R_{max}^2 \epsilon_r$ , and the policy  $\hat{\pi}$  has bounded suboptimality with  $J(\hat{R}; \hat{\pi}) \geq J(\hat{R}; \pi') - \epsilon_{\pi} \forall \pi'$ , then we have that at this equilibrium pair:

$$D_f(\rho^{\hat{\pi}}(s, a) || \rho^E(s, a)) \leq \frac{(1 - \gamma)\epsilon_{\pi} + 4R_{max}\sqrt{2\epsilon_r}}{k} \quad (7)$$

where  $D_f$  is an  $f$ -divergence with the generator function  $f(x) = \frac{1-x}{1+x}$  [53, 4, 15, 42].

*Proof.* Previous works [66, 60] characterize the equilibrium in imitation learning based on the supremum ranking loss/min-max adversarial setting under no error assumption. In this section, we consider the ranking loss function  $L_k$  and derive the equilibrium for the `rank-game` in presence of reward learning and policy optimization errors.  $L_k$  attempts to explain the rankings between the agent and the expert using their state-action visitations  $\mathcal{D}^{\pi} = \{\rho^{\pi}(s, a), \rho^E(s, a)\}$  respectively, by attempting to induce a performance gap of  $k$ . With this dataset  $\mathcal{D}^{\pi}$ ,  $L_k$  regresses the return of state or state-action pairs in the expert’s visitation to a scalar  $k$  and the agent’s visitation to a value of 0. Thus, we have:

$$L_k(\mathcal{D}; R) = \mathbb{E}_{\rho^E(s, a)}[(R(s, a) - k)^2] + \mathbb{E}_{\rho^{\pi}(s, a)}[(R(s, a) - 0)^2] \quad (8)$$

The above ranking loss is minimized ( $\nabla L_k = 0$ ) pointwise when

$$R^*(s, a) = \frac{k(\rho^E(s, a))}{\rho^E(s, a) + \rho^{\pi}(s, a)} \quad (9)$$

In practice, we have finite samples from both the expert visitation distribution and the agent distribution so we minimize the following empirical ranking loss  $\hat{L}_k(\mathcal{D}; R)$ :

$$\hat{L}_k(\mathcal{D}; R) = \frac{\sum_{s, a \in \hat{\rho}^E} [(R(s, a) - k)^2]}{|\hat{\rho}^E|} + \frac{\sum_{s, a \in \hat{\rho}^{\pi}} [(R(s, a) - 0)^2]}{|\hat{\rho}^{\pi}|} \quad (10)$$

where  $\hat{\rho}^E$  and  $\hat{\rho}^{\pi}$  are empirical state-action visitations respectively.

**From empirical loss function to reward optimality:** Since the reward function is trained with supervised learning, we can quantify the sample error in minimizing the empirical loss using concentration bounds [57] up to a constant with high probability. Since  $0 < R(s, a) < R_{max}$  With high probability,

$$\forall R, |L_k(\mathcal{D}; R) - \hat{L}_k(\mathcal{D}; R)| \leq 2R_{max}^2 \epsilon_r \quad (11)$$

where  $\epsilon_r$  is the statistical estimation error that can be bounded using concentration bounds such as Hoeffding’s. Let  $R^*$  belong to the optimal solution for  $L_k(\mathcal{D}; R)$  and  $\hat{R}^*$  belong to the optimal minimizing solution for  $\hat{L}_k(\mathcal{D}; R)$ . Therefore, we have that,

$$\forall R, \hat{L}_k(\mathcal{D}; \hat{R}^*) \leq \hat{L}_k(\mathcal{D}; R) \quad (12)$$

628 Using Eq 11 and Eq 12, we have

$$\forall R, \hat{L}_k(\mathcal{D}; \hat{R}^*) \leq \hat{L}_k(\mathcal{D}; R) \quad (13)$$

$$\leq L_k(\mathcal{D}; R) + 2R_{max}^2 \epsilon_r \quad (14)$$

$$\leq L_k(\mathcal{D}; R^*) + 2R_{max}^2 \epsilon_r \quad (15)$$

629 and similarly

$$\forall R, L_k(\mathcal{D}; R^*) \leq L_k(\mathcal{D}; R) \quad (16)$$

$$\leq \hat{L}_k(\mathcal{D}; R) + 2R_{max}^2 \epsilon_r \quad (17)$$

$$\leq \hat{L}_k(\mathcal{D}; \hat{R}^*) + 2R_{max}^2 \epsilon_r \quad (18)$$

630 Eq 15 and Eq 18 implies that  $L_k(\mathcal{D}; R^*)$  and  $\hat{L}_k(\mathcal{D}; \hat{R}^*)$  are bounded with high probability. i.e

$$|L_k(\mathcal{D}; R^*) - \hat{L}_k(\mathcal{D}; \hat{R}^*)| \leq 2R_{max}^2 \epsilon_r \quad (19)$$

631 We will use Eq 19 to show that indeed  $\hat{R}^*$  has a bounded loss compared to  $R^*$ .

$$\hat{L}_k(\mathcal{D}; \hat{R}^*) - L_k(\mathcal{D}; R^*) \leq 2R_{max}^2 \epsilon_r \quad (20)$$

$$L_k(\mathcal{D}; \hat{R}^*) - 2R_{max}^2 \epsilon_r - L_k(\mathcal{D}; R^*) \epsilon_r \leq 2R_{max}^2 \epsilon_r \quad (21)$$

$$L_k(\mathcal{D}; \hat{R}^*) - L_k(\mathcal{D}; R^*) \leq 4R_{max}^2 \epsilon_r \quad (22)$$

632 We consider the tabular MDP setting and overload  $R$  to denote a vector of reward values for the entire  
633 state-action space of size  $|\mathcal{S} \times \mathcal{A}|$ . Using the Taylor series expansion for loss function  $L_k$ , we have:

$$L_k(\mathcal{D}; \hat{R}^*) - L_k(\mathcal{D}; R^*) \leq 4R_{max}^2 \epsilon_r \quad (23)$$

$$L_k(\mathcal{D}; R^*) + \langle \nabla_{R^*} L_k(\mathcal{D}; R^*), \hat{R}^* - R^* \rangle \\ + 0.5(\hat{R}^* - R^*)^T H(\hat{R}^* - R^*) - L_k(\mathcal{D}; R^*) \leq 4R_{max}^2 \epsilon_r \quad (24)$$

$$(\hat{R}^* - R^*)^T H(\hat{R}^* - R^*) \leq 8R_{max}^2 \epsilon_r \quad (25)$$

634 where  $H$  denotes the hessian for the loss function w.r.t  $R$  and is given by  $H = P\rho^\pi + P\rho^E$  where  $P\rho$   
635 is a matrix of size  $|\mathcal{S} \times \mathcal{A}| \times |\mathcal{S} \times \mathcal{A}|$  with  $\rho$  vector of visitations as its diagonal and zero elsewhere.

$$(\hat{R}^* - R^*)^T H(\hat{R}^* - R^*) \leq 8R_{max}^2 \epsilon_r \quad (26)$$

$$\mathbb{E}_{s \sim \rho^\pi} [(\hat{R}^*(s, a) - R^*(s, a))^2] + \mathbb{E}_{s \sim \rho^E} [(\hat{R}^*(s, a) - R^*(s, a))^2] \leq 8R_{max}^2 \epsilon_r \quad (27)$$

636 Since both terms in the LHS are positive we have  $\mathbb{E}_{s, a \sim \rho^\pi} [(\hat{R}^*(s, a) - R^*(s, a))^2] \leq 8R_{max}^2 \epsilon_r$

637 and  $\mathbb{E}_{s, a \sim \rho^E} [(\hat{R}^*(s, a) - R^*(s, a))^2] \leq 8R_{max}^2 \epsilon_r$ . Applying Jensen's inequality, we further have

638  $(\mathbb{E}_{s, a \sim \rho^\pi} [\hat{R}^*(s, a) - R^*(s, a)])^2 \leq 8R_{max}^2 \epsilon_r$  and  $(\mathbb{E}_{s, a \sim \rho^E} [\hat{R}^*(s, a) - R^*(s, a)])^2 \leq 8R_{max}^2 \epsilon_r$ .

639 Hence,

$$\left| \mathbb{E}_{s, a \sim \rho^\pi} [\hat{R}^*(s, a) - R^*(s, a)] \right| \leq R_{max} \sqrt{8\epsilon_r}, \text{ and} \quad (28)$$

$$\left| \mathbb{E}_{s, a \sim \rho^E} [\hat{R}^*(s, a) - R^*(s, a)] \right| \leq R_{max} \sqrt{8\epsilon_r} \quad (29)$$

640 At this point we have bounded the expected difference between the reward functions obtained from  
641 the empirical ranking loss and the true ranking loss. We will now characterize the equilibrium  
642 obtained by learning a policy on the reward function  $\hat{R}^*$  that is optimal under the empirical ranking  
643 loss. Under a policy optimization error of  $\epsilon_\pi$  we have:

$$J(\hat{R}^*; \hat{\pi}) \geq J(\hat{R}^*; \pi') - \epsilon_\pi \quad \forall \pi' \in \Pi \quad (30)$$

644 where  $J(R; \pi)$  denotes the performance of policy  $\pi$  under reward function  $R$ .



645 Taking  $\pi' = \pi^E$ , we can reduce the above expression as follows:

$$J(\hat{R}^*, \pi^E) - J(\hat{R}^*, \hat{\pi}) \leq \epsilon_\pi \quad (31)$$

$$\frac{1}{1-\gamma} \left[ \mathbb{E}_{\rho^E(s,a)} [\hat{R}^*(s,a)] - \mathbb{E}_{\rho^\pi(s,a)} [\hat{R}^*(s,a)] \right] \leq \epsilon_\pi \quad (32)$$

646 Using Eq 28 and Eq 29 we can lower bound  $\mathbb{E}_{\rho^E(s,a)} [\hat{R}^*(s,a)] - \mathbb{E}_{\rho^\pi(s,a)} [\hat{R}^*(s,a)]$  as follows:

$$\mathbb{E}_{\rho^E(s,a)} [\hat{R}^*(s,a)] \geq \mathbb{E}_{\rho^E(s,a)} [R^*(s,a)] - R_{max} \sqrt{8\epsilon_r} \quad (33)$$

$$\mathbb{E}_{\rho^\pi(s,a)} [\hat{R}^*(s,a)] \leq \mathbb{E}_{\rho^\pi(s,a)} [R^*(s,a)] + R_{max} \sqrt{8\epsilon_r} \quad (34)$$

647 where  $R^*(s,a)$  is given by Equation 9.

648 Subtracting Equation 34 from Equation 33, we have

$$\mathbb{E}_{\rho^E(s,a)} [\hat{R}^*(s,a)] - \mathbb{E}_{\rho^\pi(s,a)} [\hat{R}^*(s,a)] \geq \mathbb{E}_{\rho^E(s,a)} [R^*(s,a)] - \mathbb{E}_{\rho^\pi(s,a)} [R^*(s,a)] - 2R_{max} \sqrt{8\epsilon_r} \quad (35)$$

649 Plugging in the lower bound from Equation 35 in Equation 32 we have:

$$\frac{1}{1-\gamma} [\mathbb{E}_{\rho^E(s,a)} [R^*(s,a)] - \mathbb{E}_{\rho^\pi(s,a)} [R^*(s,a)] - 2R_{max} \sqrt{8\epsilon_r}] \leq \epsilon_\pi \quad (36)$$

650 Replacing  $R^*$  using Equation 9 we get,

$$\frac{1}{1-\gamma} \left[ \mathbb{E}_{\rho^E(s,a)} \left[ \frac{k(\rho^E(s,a))}{\rho^E(s,a) + \rho^\pi(s,a)} \right] - \mathbb{E}_{\rho^\pi(s,a)} \left[ \frac{k(\rho^E(s,a))}{\rho^E(s,a) + \rho^\pi(s,a)} \right] - 2R_{max} \sqrt{8\epsilon_r} \right] \leq \epsilon_\pi \quad (37)$$

651

$$\mathbb{E}_{\rho^E(s,a)} \left[ \frac{k(\rho^E(s,a))}{\rho^E(s,a) + \rho^\pi(s,a)} \right] - \mathbb{E}_{\rho^\pi(s,a)} \left[ \frac{k(\rho^E(s,a))}{\rho^E(s,a) + \rho^\pi(s,a)} \right] \leq (1-\gamma)\epsilon_\pi + 2R_{max} \sqrt{8\epsilon_r} \quad (38)$$

$$\mathbb{E}_{\rho^E(s,a)} \left[ \frac{(\rho^E(s,a) - \rho^\pi(s,a))}{\rho^E(s,a) + \rho^\pi(s,a)} \right] \leq \frac{(1-\gamma)\epsilon_\pi + 2R_{max} \sqrt{8\epsilon_r}}{k} \quad (39)$$

652 The convex function  $f(x) = \frac{1-x}{1+x}$  in  $\mathbb{R}^+$  defines an  $f$ -divergence. Under this generator function, the  
 653 LHS of Equation 39 defines an  $f$ -divergence between the state-visitations of the agent  $\rho^\pi(s,a)$  and  
 654 the expert  $\rho^E(s,a)$ . Hence, we have that

$$D_f[\rho^\pi(s,a), \rho^E(s,a)] \leq \frac{(1-\gamma)\epsilon_\pi + 4R_{max} \sqrt{2\epsilon_r}}{k} \quad (40)$$

655 This bound shows that the equilibrium of the ranking game is a near-optimal imitation learning  
 656 solution when ranking loss target  $k$  trades off effectively with the policy optimization error  $\epsilon_\pi$  and  
 657 reward generalization error  $\epsilon_r$ . We note that, since  $k \leq R_{max}$  we can get the tightest bound when  
 658  $k = R_{max}$ . Now, in imitation learning both  $k$  and  $R_{max}$  are tunable hyperparameters. We vary  $k$   
 659 while keeping  $k = R_{max}$  and observe in appendix D.9 that this hyperparameter can significantly  
 660 affect learning performance.  $\square$

661 **Corollary A.1.1.** (From  $f$ -divergence to performance gap) For the equilibrium of the rank-game  
 662  $(\hat{\pi}, \hat{R})$  as described in Theorem A.1, we have that the performance gap of the expert policy with  $\hat{\pi}$  is

663 bounded under the unknown expert's reward function ( $r_{gt}$ ) bounded in  $[0, R_{max}^E]$  as follows:

$$|J(\pi^E, r_{gt}) - J(\hat{\pi}, r_{gt})| \leq \frac{4R_{max}^E \sqrt{\frac{(1-\gamma)\epsilon_\pi + 4R_{max} \sqrt{2\epsilon_r}}{k}}}{1-\gamma} \quad (41)$$

664 *Proof.* In Theorem A.1, we show that the equilibrium of rank-game ensures that the  $f$ -divergence  
 665 of expert visitation and agent visitation is bounded with the generator function  $f = \frac{1-x}{1+x}$ . First we  
 666 attempt to find a tight lower bound of our  $f$ -divergence in terms of the total variational distance  
 667 between the two distributions. Such a bound has been discussed in previous literature for the usual  
 668  $f$ -divergences like KL, Hellinger and  $\chi^2$ . This problem of finding a tight lower bound in terms of  
 669 variational distance for a general  $f$ -divergence was introduced in [64] and referred to as Vajda's tight  
 670 lower bound and a solution for arbitrary  $f$ -divergences was proposed in [23]. The  $f$ -divergence with  
 671 generator function  $f = \frac{1-x}{1+x}$  satisfies that  $f(t) = tf(\frac{1}{t}) + 2f'(1)(t-1)$  and hence the total variational  
 672 bound for this  $f$  divergence takes the form  $D_f \geq \frac{2-D_{TV}}{2} f(\frac{2+D_{TV}}{2-D_{TV}}) - f'(1)D_{TV}$ . Plugging in the  
 673 function definition  $f = \frac{1-x}{1+x}$  the inequality simplifies to:

$$D_f(\rho^\pi(s, a) \parallel \rho^E(s, a)) \geq \frac{(D_{TV}(\rho^\pi(s, a) \parallel \rho^E(s, a)))^2}{4} \quad (42)$$

675 We also note an upper bound for this  $f$ -divergence in TV distance, sandwiching this particular  
 676  $f$ -divergence with TV bounds:

$$D_f(\rho^\pi(s, a) \parallel \rho^E(s, a)) = \mathbb{E}_{\rho^E(s, a)} \left[ \frac{\rho^E(s, a)}{\rho^E(s, a) + \rho^\pi(s, a)} \right] - \mathbb{E}_{\rho^\pi(s, a)} \left[ \frac{\rho^E(s, a)}{\rho^E(s, a) + \rho^\pi(s, a)} \right] \quad (43)$$

$$\leq \sum_{s, a \in \mathcal{S} \times \mathcal{A}} |\rho^E(s, a) - \rho^\pi(s, a)| \left| \frac{\rho^E(s, a)}{\rho^E(s, a) + \rho^\pi(s, a)} \right| \quad (44)$$

$$\leq D_{TV}(\rho^\pi(s, a) \parallel \rho^E(s, a)) \quad (45)$$

677 So,

$$D_{TV}(\rho^\pi(s, a) \parallel \rho^E(s, a)) \geq D_f(\rho^\pi(s, a) \parallel \rho^E(s, a)) \geq \frac{(D_{TV}(\rho^\pi(s, a) \parallel \rho^E(s, a)))^2}{4} \quad (46)$$

678 Therefore from Eq 40 we have that,

$$D_{TV}(\rho^\pi(s, a) \parallel \rho^E(s, a)) \leq 2\sqrt{\frac{(1-\gamma)\epsilon_\pi + 4R_{max} \sqrt{2\epsilon_r}}{k}} \quad (47)$$

679 For any policy  $\pi$ , and experts unknown reward function  $r_{gt}$ ,  $J(\pi, r) = \frac{1}{1-\gamma} [\mathbb{E}_{s, a \sim \rho^\pi} [r(s, a)]]$ .  
 680 Therefore,

$$|J(\pi^E, r_{gt}) - J(\pi, r_{gt})| = \left| \frac{1}{1-\gamma} [\mathbb{E}_{s, a \sim \rho^E} [r_{gt}(s, a)]] - \frac{1}{1-\gamma} [\mathbb{E}_{s, a \sim \rho^\pi} [r_{gt}(s, a)]] \right| \quad \forall \pi \quad (48)$$

$$= \frac{1}{1-\gamma} \left| \sum_{s, a \in \mathcal{S} \times \mathcal{A}} |(\rho^E - \rho^\pi) r_{gt}(s, a)| \right| \quad (49)$$

$$\leq \frac{R_{max}^E}{1-\gamma} \sum_{s, a \in \mathcal{S} \times \mathcal{A}} |(\rho^E - \rho^\pi)| \quad (50)$$

$$\leq \frac{2R_{max}^E}{1-\gamma} D_{TV}(\rho^E, \rho^\pi) \quad (51)$$

$$(52)$$

681 where  $R_{max}^E$  is the upper bound for the expert's reward function. Under a worst case expert reward  
 682 function which assigns finite reward values to the expert's visitation and  $-\infty$  outside the visitation,

even a small mistake (visiting any state outside the expert's visitation) by the policy can result in an infinite performance gap between expert and the agent. Thus, this parameter is decided by the expert and is not in control of the learning agent.

From Eq 47 and Eq 51 we have

$$|J(\pi^E, r_{gt}) - J(\hat{\pi}, r_{gt})| \leq \frac{4R_{max}^E \sqrt{\frac{(1-\gamma)\epsilon_\pi + 4R_{max}\sqrt{2\epsilon_r}}{k}}}{1-\gamma} \quad (53)$$

□

**Lemma A.2.** (Regret bound under finite data assumptions) Let  $\hat{M}_t$  denote the approximate transition model under the collected dataset of transitions until iteration  $t$ . Assume that the ground truth model  $M$  and the reward function are realizable. Under these assumptions the regret of rank-game at  $t^{th}$  iteration:

$$V_M^{\pi^E} - V_M^{\pi^t} \leq \frac{2\gamma\epsilon_m^{\pi^t} R_{max}}{(1-\gamma)^2} + \frac{4R_{max}}{1-\gamma} \sqrt{D_f(\rho_{\hat{M}_t}^{\pi^E} \|\rho_M^{\pi^E}) + \frac{2\epsilon_{stat} + 4R_{max}\sqrt{\epsilon_r}}{k}} \quad (54)$$

where  $V_M^{\pi}$  denotes the performance of policy  $\pi$  under transition dynamics  $M$ ,  $\epsilon_m^{\pi^t}$  is expected model error under policy  $\pi^t$ 's visitation,  $\rho_M^{\pi^E}$  is the visitation of policy  $\pi$  in transition dynamics  $M$  and  $\epsilon_{stat}$  is the statistical error due to finite expert samples.

*Proof.* We use  $M$  to denote the ground truth model and  $\hat{M}_t$  to denote the approximate transition model with collected data until the  $t^{th}$  iteration of rank-game. We are interested in solving the following optimization problem under finite data assumptions:

$$\max_{\pi} \mathbb{E}_{s,a \sim \rho_{\hat{M}_t}^{\pi}} [\hat{f}_{\pi}^*(s, a)] - \frac{\sum_{s,a \in \hat{\rho}^E} [\hat{f}_{\pi}^*(s, a)]}{|\hat{\rho}^E|} \quad s.t. \quad \hat{f}_{\pi}^* = \arg \min_f (\hat{L}_k(f; D_{\hat{M}_t}^{\pi})) \quad (55)$$

where  $\hat{\rho}^E$  is the empirical distribution generated from finite expert samples and  $D_{\hat{M}_t}^{\pi} = \{(\hat{\rho}_{\hat{M}_t}^{\pi}, \hat{\rho}_M^E)\}$ . Using standard concentration bounds such as Hoeffding's [29], we can bound the empirical estimate with true estimate  $\forall \pi$  with high probability:

$$\left| \frac{\sum_{s,a \in \hat{\rho}^E} [\hat{f}_{\pi}^*(s, a)]}{|\hat{\rho}^E|} - \mathbb{E}_{s \sim \rho_M^E} [\hat{f}_{\pi}^*(s, a)] \right| \leq \epsilon_{stat} \quad (56)$$

Using the concentration bounds and the fact that  $\pi^t$  is the solution that maximizes the optimization problem Eq 55 at  $t$ -iteration,

$$\begin{aligned} \mathbb{E}_{s,a \sim \rho_{\hat{M}_t}^{\pi^t}} [\hat{f}_{\pi^t}^*(s, a)] - \frac{\sum_{s,a \in \hat{\rho}^E} [\hat{f}_{\pi^t}^*(s, a)]}{|\hat{\rho}^E|} &\geq \mathbb{E}_{s,a \sim \rho_{\hat{M}_t}^{\pi^E}} [\hat{f}_{\pi^E}^*(s, a)] - \frac{\sum_{s,a \in \hat{\rho}^E} [\hat{f}_{\pi^E}^*(s, a)]}{|\hat{\rho}^E|} \\ &\geq \mathbb{E}_{s,a \sim \rho_{\hat{M}_t}^{\pi^E}} [\hat{f}_{\pi^E}^*(s, a)] - \mathbb{E}_{s,a \sim \rho_M^E} [\hat{f}_{\pi^E}^*(s, a)] - \epsilon_{stat} \end{aligned} \quad (57)$$

$\hat{f}_{\pi^t}^*$  is the reward function that minimizes the empirical ranking loss  $\hat{L}_k$ . Let  $f_{\pi^t}^*$  be the solution to the true ranking loss  $L_k$ . As shown previously in Eq 28 and Eq 29, we can bound the expected values of these two quantities with high probability under agent or expert distribution.

We also have from concentration bound:

$$\mathbb{E}_{s,a \sim \rho_{\hat{M}_t}^{\pi^t}} [\hat{f}_{\pi^t}^*(s, a)] - \frac{\sum_{s,a \in \hat{\rho}^E} [\hat{f}_{\pi^t}^*(s, a)]}{|\hat{\rho}^E|} \leq \mathbb{E}_{s,a \sim \rho_{\hat{M}_t}^{\pi^t}} [\hat{f}_{\pi^t}^*(s, a)] - \mathbb{E}_{s,a \sim \rho_M^E} [\hat{f}_{\pi^t}^*(s, a)] + \epsilon_{stat} \quad (59)$$

Therefore, combining Eq 59 and Eq 57:

$$\mathbb{E}_{s,a \sim \rho_{\hat{M}_t}^{\pi^t}} [\hat{f}_{\pi^t}^*(s, a)] - \mathbb{E}_{s,a \sim \rho_M^E} [\hat{f}_{\pi^t}^*(s, a)] \geq \mathbb{E}_{s,a \sim \rho_{\hat{M}_t}^{\pi^E}} [\hat{f}_{\pi^E}^*(s, a)] - \mathbb{E}_{s,a \sim \rho_M^E} [\hat{f}_{\pi^E}^*(s, a)] - 2\epsilon_{stat} \quad (60)$$

708 The LHS of the Eq. 60 can be further upper bounded as follows:

$$\mathbb{E}_{s,a \sim \rho_{\hat{M}_t}^{\pi^t}} [\hat{f}_{\pi^t}^*(s, a)] - \mathbb{E}_{s,a \sim \rho_M^E} [\hat{f}_{\pi^t}^*(s, a)] \leq \mathbb{E}_{s,a \sim \rho_{\hat{M}_t}^{\pi^t}} [f_{\pi^t}^*(s, a)] - \mathbb{E}_{s,a \sim \rho_M^E} [f_{\pi^t}^*(s, a)] + 2R_{max}\sqrt{8\epsilon_r} \quad (61)$$

$$\begin{aligned} &= \mathbb{E}_{s,a \sim \rho_{\hat{M}_t}^{\pi^t}} \left[ \frac{k\rho_M^{\pi^E}(s, a)}{\rho_M^{\pi^E}(s, a) + \rho_{\hat{M}_t}^{\pi^t}(s, a)} \right] \\ &- \mathbb{E}_{s,a \sim \rho_M^E} \left[ \frac{k\rho_M^{\pi^E}(s, a)}{\rho_M^{\pi^E}(s, a) + \rho_{\hat{M}_t}^{\pi^t}(s, a)} \right] + 2R_{max}\sqrt{8\epsilon_r} \end{aligned} \quad (62)$$

$$= k\mathbb{E}_{s,a \sim \rho_M^{\pi^E}} \left[ \frac{\rho_{\hat{M}_t}^{\pi^t}(s, a) - \rho_M^{\pi^E}(s, a)}{\rho_{\hat{M}_t}^{\pi^t}(s, a) + \rho_M^{\pi^E}(s, a)} \right] + 2R_{max}\sqrt{8\epsilon_r} \quad (63)$$

$$= -kD_f(\rho_{\hat{M}_t}^{\pi^t} \parallel \rho_M^{\pi^E}) + 2R_{max}\sqrt{8\epsilon_r} \quad (64)$$

709 Similarly the RHS of Eq 60 can be further lower bounded as follows:

$$\mathbb{E}_{s,a \sim \rho_{\hat{M}_t}^{\pi^E}} [\hat{f}_{\pi^E}^*(s, a)] - \mathbb{E}_{s,a \sim \rho_M^E} [\hat{f}_{\pi^E}^*(s, a)] - 2\epsilon_{stat} \quad (65)$$

$$\geq \mathbb{E}_{s,a \sim \rho_{\hat{M}_t}^{\pi^E}} [f_{\pi^E}^*(s, a)] - \mathbb{E}_{s \sim \rho_M^E} [f_{\pi^E}^*(s, a)] - 2\epsilon_{stat} - 2R_{max}\sqrt{8\epsilon_r} \quad (66)$$

$$= k\mathbb{E}_{s,a \sim \rho_M^{\pi^E}} \left[ \frac{\rho_{\hat{M}_t}^{\pi^E}(s, a) - \rho_M^{\pi^E}(s, a)}{\rho_{\hat{M}_t}^{\pi^E}(s, a) + \rho_M^{\pi^E}(s, a)} \right] - 2\epsilon_{stat} - 2R_{max}\sqrt{8\epsilon_r} \quad (67)$$

$$= -kD_f(\rho_{\hat{M}_t}^{\pi^E} \parallel \rho_M^{\pi^E}) - 2\epsilon_{stat} - 2R_{max}\sqrt{8\epsilon_r} \quad (68)$$

710 Plugging the relations obtained (Eq 68 and 64) back in Eq 60, we see that the  $f$ -divergence between  
711 the agent visitation in the learned MDP and the expert visitation in the ground truth MDP is bounded  
712 by the  $f$ -divergence of the expert policy's visitation on the learned vs. ground truth environment. We  
713 expect this term to be low if the dynamics are accurately learned at the transitions encountered in  
714 visitation of expert.

$$D_f(\rho_{\hat{M}_t}^{\pi^t} \parallel \rho_M^{\pi^E}) \leq D_f(\rho_{\hat{M}_t}^{\pi^E} \parallel \rho_M^{\pi^E}) + \frac{2\epsilon_{stat} + 4R_{max}\sqrt{8\epsilon_r}}{k} \quad (69)$$

715 We can use the total-variation lower bound for this  $f$ -divergence to later obtain a performance bound  
716 between the policy in learned MDP and expert in ground-truth MDP.

$$D_{TV}(\rho_{\hat{M}_t}^{\pi^t} \parallel \rho_M^{\pi^E}) \leq 2\sqrt{D_f(\rho_{\hat{M}_t}^{\pi^t} \parallel \rho_M^{\pi^E})} \leq 2\sqrt{D_f(\rho_{\hat{M}_t}^{\pi^E} \parallel \rho_M^{\pi^E}) + \frac{2\epsilon_{stat} + 4R_{max}\sqrt{8\epsilon_r}}{k}} \quad (70)$$

717 Similar to Corollary A.1.1, we can further get a performance bound:

$$|V_M^{\pi^E} - V_M^{\pi^t}| \leq \frac{2R_{max}}{1-\gamma} D_{TV}(\rho_{\hat{M}_t}^{\pi^t} \parallel \rho_M^{\pi^E}) \leq \frac{4R_{max}}{1-\gamma} \sqrt{D_f(\rho_{\hat{M}_t}^{\pi^E} \parallel \rho_M^{\pi^E}) + \frac{2\epsilon_{stat} + 4R_{max}\sqrt{8\epsilon_r}}{k}} \quad (71)$$

718 Let the local model error in the visitation of  $\pi^t$  be bounded by  $\epsilon_m^{\pi^t}$ , i.e  
719  $\mathbb{E}_{s,a \sim \rho^{\pi^t}} [D_{TV}(P_M(\cdot|s, a) \parallel P_{\hat{M}}(\cdot|s, a))] \leq \epsilon_m^{\pi^t}$ . Using simulation lemma for local models [35, 33],  
720 we have:

$$|V_M^{\pi^t} - V_M^{\pi^E}| \leq \frac{2\gamma\epsilon_m^{\pi^t}R_{max}}{(1-\gamma)^2} \quad (72)$$

721 We are interested in bounding the performance of the policy  $\pi^t$  in ground-truth MDP rather than the  
 722 learned MDP.

$$V_M^{\pi^E} - V_M^{\pi^t} \leq V_M^{\pi^E} - V_M^{\pi^t} + \frac{4R_{max}}{1-\gamma} \sqrt{D_f(\rho_{\hat{M}_t}^{\pi^E} \|\rho_M^{\pi^E})} + \frac{2\epsilon_{stat} + 4R_{max}\sqrt{8\epsilon_r}}{k} \quad (73)$$

$$\leq \frac{2\gamma\epsilon_m^{\pi^t} R_{max}}{(1-\gamma)^2} + \frac{4R_{max}}{1-\gamma} \sqrt{D_f(\rho_{\hat{M}_t}^{\pi^E} \|\rho_M^{\pi^E})} + \frac{2\epsilon_{stat} + 4R_{max}\sqrt{8\epsilon_r}}{k} \quad (74)$$

723 The regret of an algorithm with ranking-loss depends on the accuracy of the approximate transition  
 724 model at the visitation of the output policy  $\pi_t$  and the expected accuracy of the approximate transition  
 725 model at the transitions encountered in the visitation of expert. Using an exploratory policy optimiza-  
 726 tion procedure, the regret grows sublinearly as shown in [36]. [36] uses an exploration bonus and  
 727 shows that the RHS in the above regret simplifies to be information gain and for a number of MDP  
 728 families the growth rate of information gain is mild.  $\square$

## 729 Potential imitation suboptimality with additional rankings

730 In this section, we consider how additional rankings can affect the intended performance gap  
 731 as discussed in 4.2. Consider a tabular MDP setting in which we are given a set of rankings  
 732  $\rho^\pi \preceq \rho^1 \preceq \dots \preceq \rho^n \preceq \rho^E$ . In such a case, we regress the state-action pairs from their respective  
 733 visitations to  $[0, k_1, k_2, \dots, k_n, k]$  where  $0 < k_1 < k_2 < \dots < k_n < k$ . We will discuss in Appendix B.1.1  
 734 how this regression generalizes  $L_k$ . For this regression, the optimal reward function that minimizes  
 735 the ranking loss pointwise is given by:

$$R^*(s, a) = \frac{\sum_{i=1}^n k_i \rho^{\pi^i}(s, a) + \rho^E(s, a)}{\rho^\pi(s, a) + \sum_{i=1}^n \rho^{\pi^i}(s, a) + \rho^E(s, a)} \quad (75)$$

736 We consider a surrogate ranking loss with regression target  $k_{eff}$  that achieves the same optimal  
 737 reward when only  $\rho \preceq \rho^E$  ranking is given. Therefore:

$$\frac{\sum_{i=1}^n k_i \rho^i(s, a) + k \rho^E(s, a)}{\rho^\pi(s, a) + \sum_{i=1}^n \rho^i(s, a) + \rho^E(s, a)} = \frac{k_{eff} \rho^E(s, a)}{\rho^E(s, a) + \rho^\pi(s, a)} \quad (76)$$

738  $k'$  can be upper bounded as follows:

$$k_{eff} = \frac{\rho^E(s, a) + \rho^\pi(s, a)}{\rho^E(s, a)} \frac{\sum_{i=1}^n k_i \rho^{\pi^i}(s, a) + k \rho^E(s, a)}{\rho^\pi(s, a) + \sum_{i=1}^n \rho^{\pi^i}(s, a) + k \rho^E(s, a)} \quad (77)$$

$$\leq \frac{\rho^E(s, a) + \rho^\pi(s, a)}{\rho^E(s, a)} \frac{\sum_{i=1}^n k_i \rho^{\pi^i}(s, a) + k \rho^E(s, a)}{\rho^\pi(s, a) + \rho^E(s, a)} \quad (78)$$

$$= k + \sum_{i=1}^n k_i \frac{\rho^{\pi^i}(s, a)}{\rho^E(s, a)} \quad (79)$$

739  $k_{eff}$  can be lower bounded by:

$$k_{eff} = \frac{\rho^E(s, a) + \rho^\pi(s, a)}{\rho^E(s, a)} \frac{\sum_{i=1}^n k_i \rho^{\pi^i}(s, a) + k \rho^E(s, a)}{\rho^\pi(s, a) + \sum_{i=1}^n \rho^{\pi^i}(s, a) + \rho^E(s, a)} \quad (80)$$

$$\geq \frac{\rho^E(s, a) + \rho^\pi(s, a)}{\rho^E(s, a)} \frac{k \rho^E(s, a)}{\rho^\pi(s, a) + \sum_{i=1}^n \rho^{\pi^i}(s, a) + \rho^E(s, a)} \quad (81)$$

$$= \frac{k}{1 + \frac{\sum_{i=1}^n \rho^{\pi^i}(s, a)}{\rho^\pi(s, a) + \rho^E(s, a)}} \quad (82)$$

740 Thus,  $k_{eff}$  can increase or decrease compared to  $k$  after augmenting the ranking dataset. We discuss  
 741 the consequences of a decreased  $k$  in Section 4.2.

## B Algorithm Details

### B.1 Ranking Loss for the Reward Agent

Consider a dataset of behavior rankings  $\mathcal{D} = \{(\rho_1^1 \preceq \rho_1^2), (\rho_2^1 \preceq \rho_2^2), \dots, (\rho_n^1 \preceq \rho_n^2)\}$ , wherein for  $\rho_j^i$  —  $i$  denotes the comparison index within a pair of policies,  $j$  denotes the pair number, and  $\rho_1^1 \preceq \rho_1^2$  denotes that  $\rho_1^2$  is preferable in comparison to  $\rho_1^1$  and in turn implies that  $\rho_1^2$  has a higher return. Each pair of behavior comparisons in the dataset are between the state-action or state visitations. We will restrict our attention to a specific instantiation of the ranking loss (a regression loss) that attempts to explain the rankings between each pair of policies present in the dataset by a performance gap of at least  $k$ , i.e.  $\mathbb{E}_{\rho^1}[R(s, a)] \leq \mathbb{E}_{\rho^2}[R(s, a)] - k$ . Formally, the ranking loss is defined as follows:

$$\min_R L_k(\mathcal{D}; R) = \min_R \mathbb{E}_{(\rho^1, \rho^2) \sim \mathcal{D}} [\mathbb{E}_{s \sim \rho^1(s, a)} [(R(s, a) - 0)^2] + \mathbb{E}_{s \sim \rho^2(s, a)} [(R(s, a) - k)^2]] \quad (83)$$

When  $k$  is set to 1 ( $k = 1$ ), this loss function resembles the loss function used for SQIL [52]. Thus, SQIL can be understood as a special case.

Our work explores the setting of imitation learning given samples from state or state-action visitation  $\rho^E$  of the expert  $\pi^E$ . We will use  $\pi_m^{agent}$  to denote the  $m^{th}$  update of the agent in Algorithm 1. The updated agent generates a new visitation in the environment which is stored in an empty dataset  $\mathcal{D}_m^{online}$  given by  $\mathcal{D}_m^{online} = \{\rho_m^{agent} \preceq \rho^E\}$

#### B.1.1 Reward loss with automatically generated rankings (auto)

The ranking dataset  $\mathcal{D}^p$  contains pairwise comparison between behaviors  $\rho_i \preceq \rho_j$ . First, we assume access to the trajectories that generate the behaviors, i.e.  $\rho^i = \{\tau_1^i, \tau_2^i, \dots, \tau_n^i\}$  and  $\rho^j = \{\tau_1^j, \tau_2^j, \dots, \tau_m^j\}$ . In this method we propose to automatically generate additional rankings using the following procedure: (a) Sample trajectory  $\tau^i \sim \rho^i$  and  $\tau^j \sim \rho^j$ . Both trajectories are equal length because of our use of absorbing states (see Appendix C). (b) Generate an interpolation  $\tau_{\lambda_p}^{ij}$  between trajectories depending on a parameter  $\lambda_p$ . A trajectory is a matrix of dimensions  $H \times (|S| + |\mathcal{A}|)$ , where  $H$  is the horizon length of all the trajectories.

$$\tau_{\lambda_p}^{ij} = \lambda_p \tau^i + (1 - \lambda_p) \tau^j \quad (84)$$

These intermediate interpolated trajectories lead to a ranking that matches the ranking under the expert reward function if the reward function is indeed linear in state features. We further note that  $\tau$  can also be a trajectory of features rather than state-action pairs.

Next, we generate regression targets for the interpolated trajectories. For a trajectory  $\tau_{\lambda_p}^{ij}$  the regression target is given by a vector  $\lambda_p \mathbf{0} + (1 - \lambda_p) k \mathbf{1}$ , where vectors  $\mathbf{0}, \mathbf{1}$  are given by  $[0, 0, \dots, 0]$  and  $[1, 1, \dots, 1]$  of length  $H$  respectively. This procedure can be regarded as a form of mixup [68] in trajectory space. The set of obtained  $\tau_{\lambda_p}^{ij}$  after expending the sampling budget forms our behavior  $\rho_{\lambda_p}^{ij}$ .

#### A generalized and computationally efficient interpolation strategy for rank-game

Once we have generated  $P$  interpolated rankings, we effectively have  $O(P^2)$  rankings that we can use to augment our ranking dataset. Using them all naively would incur a high memory burden. Thus, we present another method for achieving the same objective of using automatically generated rankings in a more efficient and generalized way. For each pairwise ranking  $\rho^i \preceq \rho^j$  in the dataset  $\mathcal{D}^p$ , we have the following new set of rankings  $\rho^i \preceq \rho_{\lambda_1}^{ij} \preceq \dots \preceq \rho_{\lambda_P}^{ij} \preceq \rho^j$ . Using the  $O(P^2)$  rankings in the ranking loss  $L_k$ , the ranking loss can be simplified to the following using basic algebraic manipulation:

$$\begin{aligned}
& (P+1)\mathbb{E}_{(s,a)\sim\rho^j}[(R(s,a)-k)^2] + (P)\mathbb{E}_{(s,a)\sim\rho_{\lambda_P}^{ij}}[(R(s,a)-k)^2] + \dots + (1)\mathbb{E}_{(s,a)\sim\rho_{\lambda_1}^{ij}}[(R(s,a)-k)^2] \\
& + (P+1)\mathbb{E}_{(s,a)\sim\rho^i}[(R(s,a)-0)^2] + (P)\mathbb{E}_{(s,a)\sim\rho_{\lambda_P}^{ij}}[(R(s,a)-0)^2] + \dots + (1)\mathbb{E}_{(s,a)\sim\rho_{\lambda_1}^{ij}}[(R(s,a)-0)^2]
\end{aligned} \tag{85}$$

781 The reward function that minimizes the above loss pointwise is given by:

$$R^*(s,a) = \frac{k[(P+1)\rho^j + P\rho_{\lambda_P}^{ij} + (P-1)\rho_{\lambda_{P-1}}^{ij} + \dots + \rho_{\lambda_1}^{ij}]}{(P+1)(\rho^j + \rho_{\lambda_P}^{ij} + \dots + \rho_{\lambda_1}^{ij} + \rho^i)} \tag{86}$$

$$= \frac{k[\rho^j + \frac{P}{P+1}\rho_{\lambda_P}^{ij} + \frac{P-1}{P+1}\rho_{\lambda_{P-1}}^{ij} + \dots + \frac{1}{P+1}\rho_{\lambda_1}^{ij}]}{(\rho^j + \rho_{\lambda_P}^{ij} + \dots + \rho_{\lambda_1}^{ij} + \rho^i)} \tag{87}$$

782 We consider a modification to the ranking loss objective (Equation 83) that increases flexibility in  
783 regression targets for ranking as well as reducing the computational burden from dealing with  $O(P^2)$   
784 rankings pairs to  $O(P)$ . In this modification we regress the current agent, the expert, and each of  
785 the intermediate interpolants  $(\rho^i, \rho_{\lambda_1}^{ij}, \dots, \rho_{\lambda_P}^{ij}, \rho^E)$  to a fixed scalar return  $(k_0, k_1, \dots, k_{P+1})$  where  
786  $k_0 \leq k_1 \leq \dots \leq k_{P+1} = k$ . The optimal reward function for this loss function is given by:

$$R^*(s,a) = \frac{k_{p+1}\rho^E(s,a) + k_p\rho_{\lambda_P}^{ij}(s,a) + k_{p-1}\rho_{\lambda_{P-1}}^{ij}(s,a) + \dots + k_1\rho_{\lambda_1}^{ij}(s,a) + k_0\rho^\pi(s,a)}{(\rho^E(s,a) + \rho_{\lambda_P}^{ij}(s,a) + \dots + \rho_{\lambda_1}^{ij}(s,a) + \rho^\pi(s,a))} \tag{88}$$

787 This modified loss function generalizes Eq 86 and recovers it exactly when  $[k_0, k_1, \dots, k_{P+1}]$  is set to  
788 be  $[0, k\frac{1}{P+1}, \dots, k\frac{P}{P+1}, k]$ . We will call this reward loss function a *generalized ranking loss*.

789 **Shaping the ranking loss:** The generalized ranking loss contains a set of regression targets  
790  $(k_0, k_1, \dots, k_{P+1})$  which needs to be decided apriori. We propose two strategies for deciding these  
791 regression targets. We consider two families of parameterized mappings: (1) linear in  $\alpha$  ( $k_\alpha = \alpha * k$ )  
792 and (2) rate of increase in return exponential in  $\alpha$  ( $\frac{dk_\alpha}{d\alpha} \propto e^{\beta\alpha}$ ), where  $\beta$  is the temperature parameter  
793 and denote this family by  $\exp\text{-}\beta$ . We also set  $k_{\alpha=0} = 0$  (in agent's visitation) and  $k_{\alpha=1} = k$  (in  
794 expert's visitation) under the reward function that is bounded in  $[0, R_{max}]$ . The shaped ranking  
795 regression loss, denoted by  $SL_k(\mathcal{D}; R)$ , that induces a performance gap between  $p+2$  consecutive  
796 rankings  $(\rho^i = \rho_{\lambda_0}^{ij}, \rho_{\lambda_1}^{ij}, \dots, \rho_{\lambda_P}^{ij}, \rho^j = \rho_{\lambda_{P+1}}^{ij})$  is given by:

$$SL_k(\mathcal{D}; R) = \frac{1}{p+2} \sum_{i=0}^{p+1} \mathbb{E}_{s \sim \rho_{\lambda_i}^{ij}(s,a)} [(R(s,a) - k_i)^2] \tag{89}$$

797 Figure 6 above shows the flexibility in reward shaping afforded by the two families of parameterized  
798 functions. The temperature parameter  $\beta > 0$  encourages the initial preferences to have a smaller  
799 performance gap than the latter preferences. Conversely,  $\beta < 0$  encourages the initial preferences  
800 to have a larger performance gap compared to the latter preferences. We ablate these choices of  
801 parameteric functions in Appendix D.5.

## 802 B.1.2 Reward loss with offline annotated rankings (pref)

803 Automatically generated rankings are generated without any additional supervision and can be  
804 understood as a form of data augmentation. By contrast, with offline annotated rankings, we are  
805 given a fixed dataset of comparisons which is a form of additional supervision for the reward  
806 function. Automatically generated rankings can only help by making the reward landscape easier  
807 to optimize, but offline rankings can help reduce the exploration burden by informing the agent  
808 about counterfactuals that it had no information about. This can, for instance, help the agent avoid  
809 unnecessary exploration by providing a dense improvement signal. The offline rankings are either  
810 provided by a human or extracted from a set of trajectories for which ground truth reward is known.  
811 In our work, we extract offline preferences by uniformly sampling  $p$  trajectories from an offline  
812 dataset obtained from a training run of an RL method (SAC) [26] with ground truth reward.

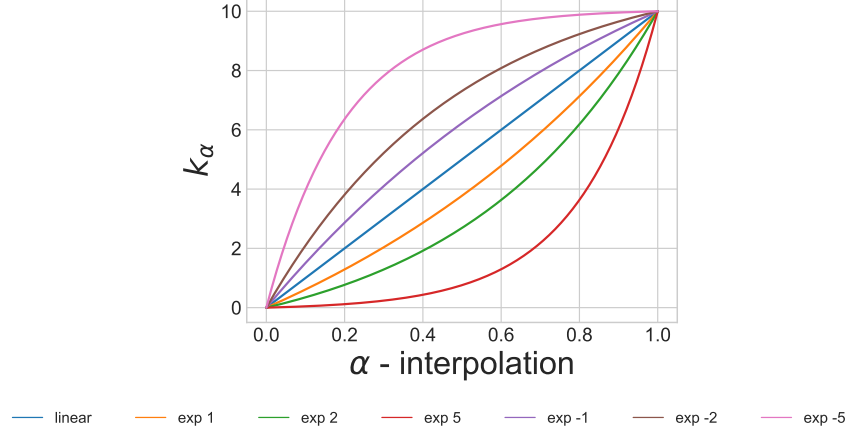

Figure 6: This figure shows the assignment of value  $k_\alpha$  (intended return value) corresponding to values of  $\alpha$  (degree of time-conditional interpolation between the visitation distribution of the agent and the expert). When the rate of increase is exponential with positive slope, we have a higher performance gap over comparisons closer to the expert and when the rate of increase is negative, the performance gap is higher for comparisons closer to the agent.

For imitation learning with offline annotated rankings, at every iteration  $m$  of Algorithm 1 we have a new dataset of rankings given by  $\mathcal{D}_m^{\text{online}} = \{\rho_m^{\text{agent}} \preceq \rho^E\}$  along with a fixed offline dataset containing rankings of the form ( $\mathcal{D}^{\text{offline}} = \{\rho^1 \preceq \rho^2 \dots \preceq \rho^p\}$ ). We always ground the offline preferences by expert’s visitation in our experiments, i.e  $\rho^p \preceq \rho^E$ . We incorporate the offline rankings as a soft constraint in reward learning by combining the ranking loss  $L_k$  between the policy agent and the expert, with a shaped ranking loss  $SL_k$  over offline trajectories:

$$L_k^{\text{offline}}(\mathcal{D}^{\text{online}}, \mathcal{D}^{\text{offline}}; R) = \lambda L_k(\mathcal{D}^{\text{online}}; R) + (1 - \lambda) * SL_k(\mathcal{D}^{\text{offline}}; R) \quad (90)$$

where  $SL_k$  is the smooth ranking loss from Equation 89. Here, instead of the consecutive rankings being interpolants, they are offline rankings. The videos attached in the supplementary show the benefit of using preferences in imitation learning. The policy learned without preferences in the pen environment drops the pen frequently and in the door environment is unable to successfully open the door.

## B.2 Stackelberg Game Instantiation

A Stackelberg game view of optimizing the two-player game with a dataset of behavior rankings leads to two methods: PAL (Policy as Leader) and RAL (Reward as Leader) (refer Section 4.3). PAL uses a fast reward update step and we simulate this step by training the reward function until convergence (using a validation set) on the dataset of rankings. We simulate a slow update step of the policy by using a few iterations of the SAC [26] update for the policy. RAL uses a slow reward update which we approximate by dataset aggregation — aggregating all the datasets of rankings generated by the agent in each previous iteration enforces the reward function to update slowly. A fast policy update is simulated by using more iterations of SAC. Since SAC does not perform well with a high update to environment step ratio, more iterations of SAC would imply more environment steps under a fixed reward function. This was observed to lead to reduced learning efficiency, and an intermediate value of SAC updates was observed to perform best (Table 5).

### B.2.1 Policy as Leader

Algorithm 2 presents pseudocode for a practical instantiation of the PAL methods - RANK-PAL (vanilla), RANK-PAL (auto) and RANK-PAL (pref) that we use in our work. Recall that (vanilla) variant uses no additional rankings, whereas (auto) uses automatically generated rankings and (pref) uses offline annotated ranking.



---

**Algorithm 2** Policy As Leader (PAL) practical instantiation

---

- 1: **Initialize:** Policy network  $\pi_\theta$ , reward network  $R_\phi$ , replay buffer  $\mathcal{R}$
- 2: **Hyperparameters:** *Common:* Policy update steps  $n_{pol}$ , Reward update steps  $n_{rew}$ , Performance gap  $k$ , empty ranking dataset  $\mathcal{D}^{online}$ , *RANK-PAL (auto):* number of interpolations  $P$ , *RANK-PAL(pref):* Offline annotated rankings  $\mathcal{D}^{offline}$ .
- 3: **for**  $m = 0, 1, 2, \dots$  **do**
- 4:   Collect transitions in the environment and add to replay buffer  $\mathcal{R}$ . Run policy update step:  $\pi_\theta^m = \text{Soft Actor-Critic}(R_\phi^{m-1}; \pi_\theta^{m-1})$  with transitions relabelled with reward obtained from  $R_\phi^{m-1}$ . // call  $n_{pol}$  times
- 5:   Add absorbing state/state-actions to all early-terminated trajectories collected in the current  $n_{pol}$  policy update steps to make them full horizon and collect in  $\mathcal{D}_m^{online}$ .  $\mathcal{D}^{online} = \mathcal{D}_m^{online}$  (discard old data).
- 6:   (for RANK-PAL(auto)) Generate interpolations for rankings in the dataset  $\mathcal{D}^{online}$  and collect in  $\mathcal{D}_{auto}^{online}$
- 7:   Reward Update step: // call  $n_{rew}$  times

$$R_\phi^m = \begin{cases} \min L_k(\mathcal{D}^{online}; R_\phi^{m-1}), & \text{RANK-PAL (vanilla) (Equation 83)} \\ \min SL_k(\mathcal{D}_{auto}^{online}; R_\phi^{m-1}), & \text{RANK-PAL (auto) (Equation 89)} \\ \min L_k^{offline}(\mathcal{D}^{online}, \mathcal{D}^{offline}; R), & \text{RANK-PAL (pref) (Equation 90)} \end{cases}$$

8: **end for**

---

## 840 B.2.2 Reward as Leader

841 Algorithm 3 presents psuedocode for a practical instantiation of the RAL methods - RANK-RAL  
842 (vanilla), RANK-RAL (auto).

---

**Algorithm 3** Reward As Leader (RAL) practical instantiation

---

- 1: **Initialize:** Policy network  $\pi_\theta$ , reward network  $R_\phi$ , replay buffer  $\mathcal{R}$ , trajectory buffer  $D$
- 2: **Hyperparameters:** *Common:* Policy update steps  $n_{pol}$ , Reward update steps  $n_{rew}$ , Performance gap  $k$ , empty ranking dataset  $\mathcal{D}^{online}$ , *RANK-PAL (auto):* number of interpolations  $P$ , *RANK-PAL(pref):* Offline annotated rankings  $\mathcal{D}^{offline}$ .
- 3: **for**  $m = 0, 1, 2, \dots$  **do**
- 4:   Collect transitions in the environment and add to replay buffer  $\mathcal{R}$ . Run policy update step:  $\pi_\theta^m = \text{Soft Actor-Critic}(R_\phi^{m-1}; \pi_\theta^{m-1})$  with transitions relabelled with reward obtained from  $R_\phi^{m-1}$ . // call  $n_{pol}$  times
- 5:   Add absorbing state/state-actions to all early-terminated trajectories collected in the current  $n_{pol}$  policy update steps to make them full horizon and collect in  $D_m^{online}$ . Aggregate data in  $\mathcal{D}^{online} = \mathcal{D}_m^{online} \cup \mathcal{D}^{online}$ .
- 6:   (for RANK-RAL(auto)) Generate interpolations for rankings in the dataset  $\mathcal{D}^{online}$  and collect in  $\mathcal{D}_{auto}^{online}$
- 7:   Reward Update step: // call  $n_{rew}$  times

$$R_\phi^m = \begin{cases} \min L_k(\mathcal{D}^{online}; R_\phi^{m-1}), & \text{RANK-RAL (vanilla) (Equation 83)} \\ \min SL_k(\mathcal{D}_{auto}^{online}, R_\phi^{m-1}), & \text{RANK-RAL(auto) (Equation 89)} \end{cases}$$

8: **end for**

---

## 843 C Implementation and Experiment Details

844 **Environments:** Figure 7 shows some of the environments we use in this work. For benchmarking  
845 we use 6 MuJoCo (licensed under CC BY 4.0) locomotion environments. We also test our method on  
846 manipulation environments - Door opening environment from Robosuite [70] (licensed under MIT  
847 License) and the Pen-v0 environment from mjrl [50] (licensed under Apache License 2.0).

| Env               | Swimmer            | Hopper            | HalfCheetah        | Walker             | Ant               | Humanoid          |
|-------------------|--------------------|-------------------|--------------------|--------------------|-------------------|-------------------|
| BCO               | 102.76±0.90        | 20.10±2.15        | 5.12±3.82          | 4.00±1.25          | 12.80±1.26        | 3.90±1.24         |
| GaiFO             | 99.04±1.61         | 81.13± 9.99       | 13.54±7.24         | 83.83±2.55         | 20.10±24.41       | 3.93±1.81         |
| DACfO             | 95.09±6.14         | 94.73±3.63        | 85.03±5.09         | 54.70±44.64        | 86.45±1.67        | 19.31±32.19       |
| $f$ -IRL          | 103.89±2.37        | 97.45± 0.61       | 96.06±4.63         | <b>101.16±1.25</b> | 71.18±19.80       | 77.93±6.372       |
| OPOLO             | 98.64±0.14         | 89.56±5.46        | 88.92±3.20         | 79.19±24.35        | 93.37± 3.78       | 24.87±17.04       |
| IMIT-PAL (ours)   | <b>105.93±3.12</b> | 86.47± 7.66       | 90.65±15.17        | 75.60±1.90         | 82.40±9.05        | 94.49±3.21        |
| IMIT-RAL (ours)   | 100.35±3.6         | 92.34±8.63        | 96.80±2.45         | 94.41±2.94         | 78.06±4.24        | 91.27±9.33        |
| RANK-PAL (ours)   | 98.83±0.09         | 87.14± 16.14      | 94.05±3.59         | 93.88±0.72         | <b>98.93±1.83</b> | <b>96.84±3.28</b> |
| RANK-RAL (ours)   | 99.31±1.50         | <b>99.34±0.20</b> | <b>101.14±7.45</b> | 93.24±1.25         | 93.21±2.98        | 94.45±4.13        |
| Expert            | 100.00± 0          | 100.00± 0         | 100.00± 0          | 100.00± 0          | 100.00± 0         | 100.00± 0         |
| ( $ S $ , $ A $ ) | (8, 2)             | (11, 3)           | (17, 6)            | (17, 6)            | (111, 8)          | (376, 17)         |

Table 3: Asymptotic normalized performance of LfO methods at 2 million timesteps on MuJoCo locomotion tasks. The results in this Table also include evaluations for the IMIT-{PAL, RAL} methods.

| Env               | Swimmer            | Hopper               | HalfCheetah            | Walker               | Ant                  | Humanoid              |
|-------------------|--------------------|----------------------|------------------------|----------------------|----------------------|-----------------------|
| BCO               | 210.22±3.43        | 721.92±89.89         | 410.83±238.02          | 224.58±71.42         | 704.88±13.49         | 324.94±44.39          |
| GaiFO             | 202.66±4.87        | 2871.47±365.73       | 1532.57±693.72         | 4666.31±143.75       | 1141.66±1400.11      | 326.69±13.26          |
| DACfO             | 194.65±14.08       | 3350.55±141.69       | 11057.54±407.26        | 3045.21±2485.33      | 5112.15±38.01        | 1165.40±1867.61       |
| $f$ -IRL          | 212.50±6.43        | 3446.33±35.66        | 12527.24±344.95        | <b>5630.32±71.35</b> | 4200.48±1124.17      | 4362.46±459.72        |
| OPOLO             | 210.84±1.31        | 3168.35±206.26       | 11576.12±155.09        | 4407.70±1356.39      | 5529.44±164.94       | 1468.90± 1041.853     |
| IMIT-PAL (ours)   | <b>216.64±7.95</b> | 3059.43±283.85       | 11806.47± 1750.24      | 4208.17±107.41       | 4872.39±480.23       | 5265.60±287.44        |
| IMIT-RAL (ours)   | 205.33±8.92        | 3266.28±318.03       | 12626.18±54.71         | 5254.54±165.19       | 4612.8±192.06        | 5089.88±621.07        |
| RANK-PAL (ours)   | 202.24±1.80        | 3082.98±582.59       | 12259.06± 206.82       | 5225.49±42.02        | <b>5862.42±47.68</b> | <b>5393.45±291.16</b> |
| RANK-RAL (ours)   | 203.20±4.65        | <b>3512.67±21.09</b> | <b>13204.49±721.77</b> | 5189.51±71.27        | 5520.14±116.77       | 5262.96±337.44        |
| Expert            | 204.6 ± 0          | 3535.88 ± 0          | 13051.46 ± 0           | 5456.91 ± 0          | 5926.17 ± 0          | 5565.53 ± 0           |
| ( $ S $ , $ A $ ) | (8, 2)             | (11, 3)              | (17, 6)                | (17, 6)              | (111, 8)             | (376, 17)             |

Table 4: Asymptotic performance of LfO methods at 2 million timesteps on MuJoCo locomotion tasks. The results in this Table also include evaluations for the IMIT-{PAL, RAL} methods.

848 **Expert data:** For all environments, we obtain expert data by a policy trained until convergence using  
849 SAC [26] with ground truth rewards.

850 **Baselines:** We compare our proposed methods against 6 representative LfO approaches that cover a  
851 spectrum of on-policy and off-policy, model-free methods from prior work: GAIfo [62, 28], DACfO  
852 [37], BCO [61],  $f$ -IRL [45], OPOLO [71] and IQ-Learn [21]. GAIfo [62] is a modification of  
853 the adversarial GAIL method [28], in which the discriminator is trained to distinguish between  
854 state-distributions rather than state-action distributions. DAC-fO [37] is an off-policy modification  
855 of GAIfo [62], in which the discriminator distinguishes the expert states with respect to the entire  
856 replay buffer of the agent’s previously visited states, with additional implementation details such as  
857 added absorbing states to early-terminated trajectories. BCO [61] learns an inverse dynamics model,  
858 iteratively using the state-action-next state visitation in the environment and using it to predict the  
859 actions that generate the expert state trajectory. OPOLO [71] is a recent method which presents  
860 a principled off-policy approach for imitation learning by minimizing an upper-bound of the state  
861 marginal matching objective. IQ-Learn [21] proposes to make imitation learning non-adversarial by  
862 directly optimizing the Q-function and removing the need to learn a reward as a subproblem. All the  
863 approaches only have access to expert state-trajectories.

864 We use the author’s open-source implementations of baselines OPOLO, DACfO, GAIfo, BCO avail-  
865 able at <https://github.com/illidanlab/opolo-code>. We use the author-provided  
866 hyperparameters (similar to those used in [71]) for all MuJoCo locomotion environments. For  $f$ -IRL,  
867 we use the author implementation available at <https://github.com/twni2016/f-IRL> and  
868 we use the author provided hyperparameters. IQ-Learn was tested on our expert dataset by following  
869 authors implementation found here: <https://github.com/Div99/IQ-Learn>. We tested  
870 two IQ-Learn loss variants: ‘v0’ and ‘value’ as found in their hyperparameter configurations and took  
871 the best out of the two runs.

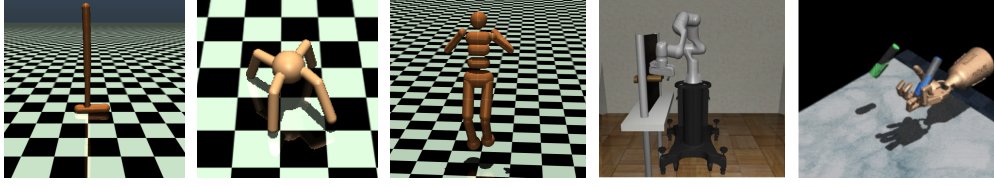

Figure 7: We evaluate `rank-game` over environments including Hopper-v2, Ant-v2, Humanoid-v2, Door, and Pen-v0.

**Policy Optimization:** We implement RANK-PAL and RANK-RAL with policy learning using SAC [26]. We build upon the SAC code [2] (<https://github.com/openai/spinningup>) without changing any hyperparameters.

**Reward Learning:** For reward learning, we use an MLP parameterized by two hidden layers of 64 dimensions each. Furthermore, we clip the outputs of the reward network between  $[-10, 10]$  range to keep the range of rewards bounded while also adding an L2 regularization of 0.01. We add absorbing states to early terminated agent trajectories following [38]. For training the ranking loss until convergence in both update strategies (PAL and RAL), we used evaluation on a holdout set that is 0.1 the total dataset size as a proxy for convergence.

**Data sharing between players:** We rely on data sharing between players to utilize the same collected transitions for both players' gradient updates. The reward learning objective in RANK-PAL and RANK-RAL requires rolling out the current policy. This makes using an off-policy routine for training the policy player quite inefficient, since off-policy model-free algorithms update a policy frequently even when executing a trajectory. To remedy this, we reuse the data collected with a mixture of policies obtained during the previous off-policy policy learning step for training the reward player. This allows us to reuse the same data for policy learning as well as reward learning at each iteration.

**Ranking loss for reward shaping via offline annotated rankings:** In practice for the (pref) setting (Section 4.2), to increase supervision and prevent overfitting, we augment the offline dataset by regressing the snippets (length  $l$ ) of each offline trajectory  $\tau^i$  for behavior  $\rho^i$  to  $k * l$ , in addition to regressing the rewards for each state to  $k$ . The snippets are generated as contiguous subsequence from the trajectory, similar to [10].

## C.1 Hyperparameters

Hyperparameters for RANK- $\{\text{PAL}, \text{RAL}\}$  (vanilla, auto and pref) methods are shown in Table 5. For RANK-PAL, we found the following hyperparameters to give best results:  $n_{pol} = H$  and  $n_{rew} = (\text{'validation' or } H/b)$ , where  $H$  is the environment horizon (usually set to 1000 for MuJoCo locomotion tasks) and  $b$  is the batch size used for the reward update. For RANK-RAL, we found  $n_{pol} = H$  and  $n_{rew} = (\text{'validation' or } |D|/b)$ , where  $|D|$  indicates the cumulative size of the ranking dataset. We found that scaling reward updates proportionally to the size of the dataset also performs well and is a computationally effective alternative to training the reward until convergence (see Section D.7).

## D Additional Experiments

### D.1 Complete evaluation of LfO with `rank-game(auto)`

Figure 8 shows a comparison of RANK-PAL(auto) and RANK-RAL(auto) for the LfO setting on the Mujoco benchmark tasks: Swimmer-v2, Hopper-v2, HalfCheetah-v2, Walker2d-v2, Ant-v2 and Humanoid-v2. This section provides complete results for Section 5.1 in the main paper.

| Hyperparameter                                    | Value           |
|---------------------------------------------------|-----------------|
| Policy updates $n_{pol}$                          | H               |
| Reward batch size( $b$ )                          | 1024            |
| Reward gradient updates $n_{rew}$                 | val or IDI/1024 |
| Reward learning rate                              | 1e-3            |
| Reward clamp range                                | [-10,10]        |
| Reward l2 weight decay                            | 0.0001          |
| Number of interpolations [auto]                   | 5               |
| Reward shaping parameterization [auto]            | exp-[-1]        |
| Offline rankings loss weight ( $\lambda$ ) [pref] | 0.3             |
| Snippet length $l$ [pref]                         | 10              |

Table 5: Common hyperparameters for the RANK-GAME algorithms. Square brackets in the left column indicate which hyperparameters that are specific to ‘auto’ and ‘pref’ methods.

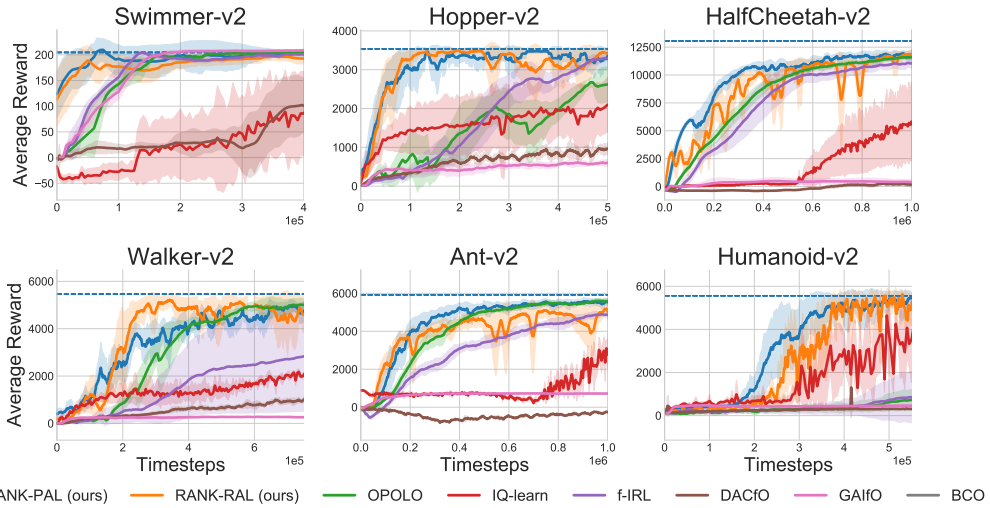

Figure 8: Comparison of performance on OpenAI gym benchmark tasks. The shaded region represents standard deviation across 5 random runs. RANK-PAL and RANK-RAL substantially outperform the baselines in sample efficiency. Dotted blue line shows the expert’s performance.

## 909 D.2 Evaluation of LfD with rank-game(auto)

910 rank-game is a general framework for both LfD(with expert states and actions) and LfO (with only  
911 expert states/observations). We compare performance of rank-game compared to LfD baselines:  
912 IQ-Learn [21], DAC [37] and BC [48].

913 In figure 9, we observe that rank-game is among the most sample efficient methods for learning  
914 from demonstrations. IQlearn shows poor learning performance on some tasks which we suspect is  
915 due to the low number of expert trajectories we use in our experiments compared to the original work.  
916 DAC was tuned using the guidelines from [46] to ensure fair comparison.

## 917 D.3 Utility of automatically generated rankings in rank-game(auto)

918 We investigate the question of how much the automatically generated rankings actually help in this  
919 experiment. To do that, we keep all the hyperparameters same and compare RANK-GAME (vanilla)  
920 with RANK-GAME (auto). RANK-GAME (vanilla) uses no additional ranking information and  $L_k$   
921 is used as the reward loss.

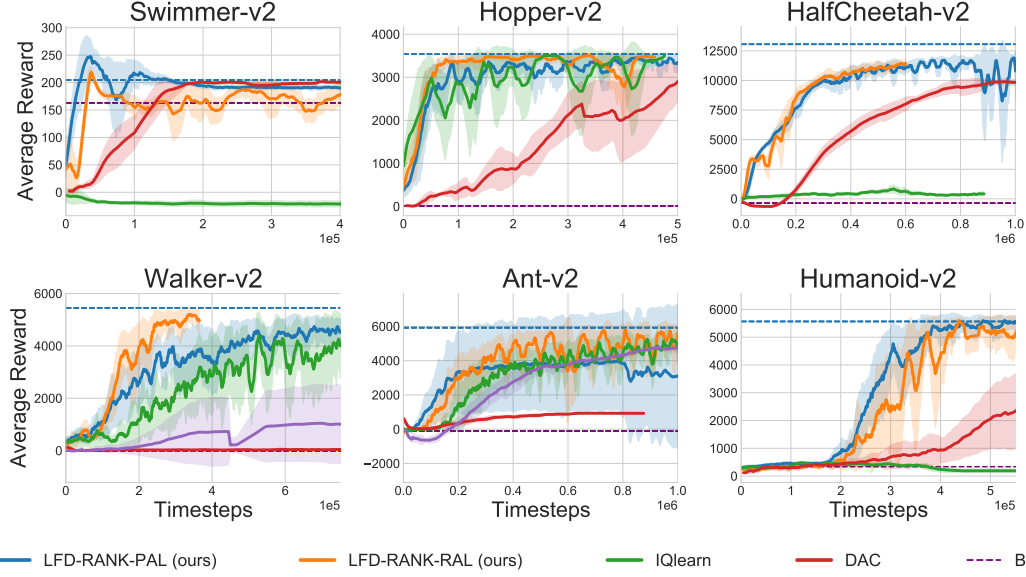

Figure 9: Comparison of `rank-game` methods with baselines in the LfD setting (expert actions are available). `RANK-{PAL,RAL}` are competitive to state of the art methods.

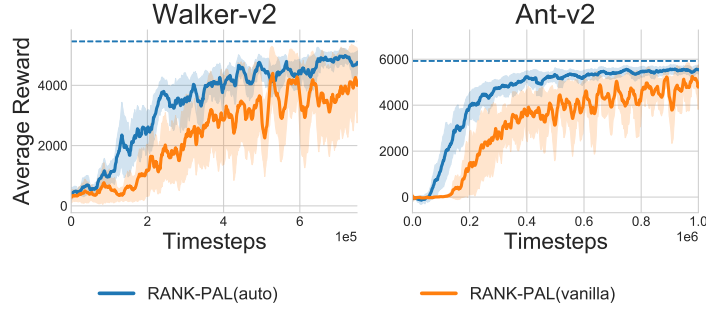

Figure 10: `RANK-PAL(vanilla)` has high variance learning curves with lower sample efficiency compared to `RANK-PAL(auto)`.

Figure 10 shows that in `RANK-PAL (auto)` has lower variance throughout training (more stable) and is more sample efficient compared to `RANK-PAL(vanilla)`.

#### D.4 Comparison of `imit-game` and `rank-game` methods

Imitation learning algorithms, particularly adversarial methods, have a number of implementation components that can affect learning performance. In this experiment, we aim to further reduce any implementation/hyperparameter gap between adversarial imitation learning (AIL) methods that are based on the *supremum-loss* (described in section 3) function and `rank-game` to bring out the obtained algorithmic improvements. To achieve this, we swap out the ranking loss  $L_k$  based on regression with a *supremum-loss* and call this method `IMIT-{PAL,RAL}`. This results in all the other hyperparameters such as batch size, reward clipping, policy and reward learning iterations, and optimizer iterations to be held constant across experiments.

We present a comparison of `RANK-{PAL, RAL}` and `IMIT-{PAL, RAL}` in terms of asymptotic performance in Table 3 and their sample efficiency in Figure 11. Note that Table 3 shows normalized returns that are mean-shifted and scaled between [0-100] using the performance of a uniform random policy and the expert policy. The expert returns are given in Table 4 and we use the following performance values from random policies for normalization: { Hopper= 13.828, HalfCheetah=

938  $-271.93$ , Walker=  $1.53$ , Ant=  $-62.01$ , Humanoid=  $112.19$ ). Table 4 shows unnormalized asymptotic  
939 performance of the different methods.

940 In terms of sample efficiency, we notice IMIT-{PAL, RAL} methods compare favorably to other  
941 regularized *supremum*-loss counterparts like GAIL and DAC but are outperformed by RANK-{PAL,  
942 RAL} (auto) methods. We hypothesize that better learning efficiency in  $L_k$  compared to *supremum*-  
943 loss is due to regression to fixed targets being a simpler optimization than maximizing the expected  
944 performance gap under two distributions.

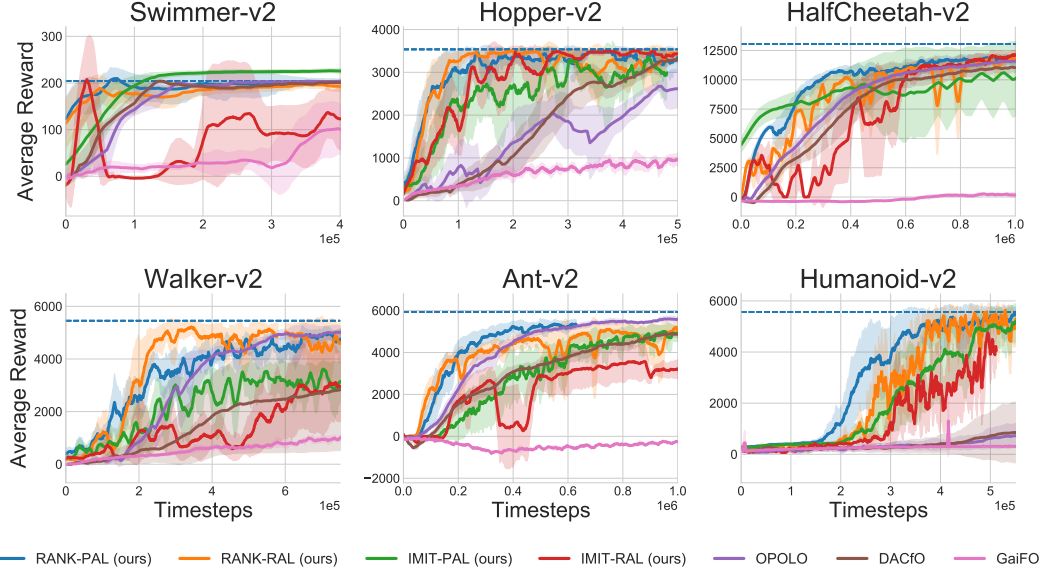

Figure 11: Comparison of performance on OpenAI gym benchmark tasks. Specifically, we seek to compare RANK-{PAL, RAL} methods to IMIT-{PAL, RAL} methods and IMIT-{PAL, RAL} methods to their non-Stackelberg counterparts GAIfo and DACfo. The shaded region represents standard deviation across 5 random runs. RANK-PAL and RANK-RAL substantially outperform the baselines in sample efficiency and IMIT-{PAL, RAL} is competitive to the strongest prior baseline OPOLO.

## 945 D.5 Effect of parameterized reward shaping in rank-game (auto)

946 We experiment with different ways of shaping the regression targets (Appendix B) for automatically  
947 generated interpolations in RANK-GAME (auto) in Figure 12. In the two left-most plots for RANK-  
948 PAL (auto), we see that reward shaping instantiations (exponential with negative temperature) which  
949 learns a higher performance gap for pairs of interpolants closer to the agent lead to higher sample  
950 efficiency. We note that decreasing the temperature too much leads to a fall in sample efficiency. The  
951 same behavior is observed in RANK-RAL (two right-most plots) methods but we find them to be  
952 more robust to parameterized shaping than PAL methods. We use the following interpolation scheme:  
953 exponential with temperature= $-1$  for our experiments in the main paper.

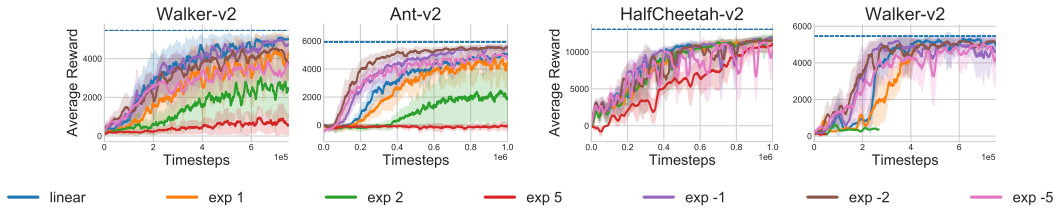

Figure 12: The two left-most plots show the effect of reward shaping in RANK-PAL (auto) methods using linear and exponential shaping functions. The two right-most plots show the same effect of reward shaping in RANK-RAL (auto) methods. Reward shaping instantiations which induce a higher performance gap between pairs of interpolants closer to the agent perform better and RAL is more robust to reward shaping variants than PAL.

## 954 D.6 On the rank preserving nature of $SL_k$

955 The ranking loss  $SL_k$  (Appendix B, Eq 89) regresses the  $\rho^i$ ,  $\rho^j$  and each of the intermediate  
 956 interpolants ( $\rho^i = \rho_{\lambda_0}^{ij}, \rho_{\lambda_1}^{ij}, \dots, \rho_{\lambda_P}^{ij}, \rho^j = \rho_{\lambda_{P+1}}^{ij}$ ) to fixed scalar returns ( $k_0, k_1, \dots, k_{P+1}$ ) where  
 957  $k_0 \leq k_1 \leq \dots \leq k_{P+1} = k$ . The ranking loss  $SL_k$  is given by:

$$SL_k(\mathcal{D}; R) = \frac{1}{p+2} \sum_{i=0}^{P+1} \mathbb{E}_{s \sim \rho_{\lambda_i}^{ij}(s,a)} [(R(s,a) - k_i)^2] \quad (91)$$

958  $SL_k$  provides a dense reward assignment for the reward agent but does not guarantee that minimizing  
 959  $SL_k$  would lead to the performance ordering between rankings, i.e  $\mathbb{E}_{\rho^1}[f(s)] < \mathbb{E}_{\rho^2}[f(s)] <$   
 960  $\mathbb{E}_{\rho^3}[f(s)] < \dots < \mathbb{E}_{\rho^{P+1}}[f(s)]$ . An ideal loss function for this task regresses the expected return  
 961 under each behavior to scalar values indicative of ranking, but needs to solve a complex credit  
 962 assignment problem. Formally, we can write the ideal loss function for reward agent as follows

$$SL_k^{ideal}(\mathcal{D}; R) = \frac{1}{p+2} \sum_{i=0}^{P+1} [\mathbb{E}_{s \sim \rho_{\lambda_i}^{ij}(s,a)} [R(s,a)] - k_i]^2 \quad (92)$$

963 We note that the  $SL_k$  upper bounds  $SL_k^{ideal}$  using Jensen's inequality and thus is a reasonable target  
 964 for optimization. In this section we wish to further understand if  $SL_k$  has a rank-preserving policy.  
 965  $SL_k$  is a family of loss function for ranking that assigns a scalar reward value for each states of a  
 966 particular state visitation corresponding to its ranking. Ideally, given a ranking between behaviors  
 967  $\rho^0 \preceq \rho^1 \preceq \rho^2 \dots \preceq \rho^{P+1}$  we aim to learn a reward function  $f$  that satisfies  $\mathbb{E}_{\rho^0}[f(s)] < \mathbb{E}_{\rho^1}[f(s)] <$   
 968  $\mathbb{E}_{\rho^2}[f(s)] < \dots < \mathbb{E}_{\rho^{P+1}}[f(s)]$ . We empirically test the ability of the ranking loss function  $SL_k$  to  
 969 facilitate the desired behavior in performance ranking. We consider a finite state space  $\mathcal{S}$  and number  
 970 of rankings  $P$ . We uniformly sample  $P+1$  possible state visitations and the intermediate regression  
 971 targets  $\{k_i\}_{i=1}^n$  s.t  $k_i \leq k_{i+1}$ . To evaluate the rank-preserving ability of our proposed loss function  
 972 we study the fraction of comparisons the optimization solution that minimizes  $SL_k$  is able to get  
 973 correct. Note that  $P+1$  sequential ranking induces  $P(P+1)/2$  comparisons.

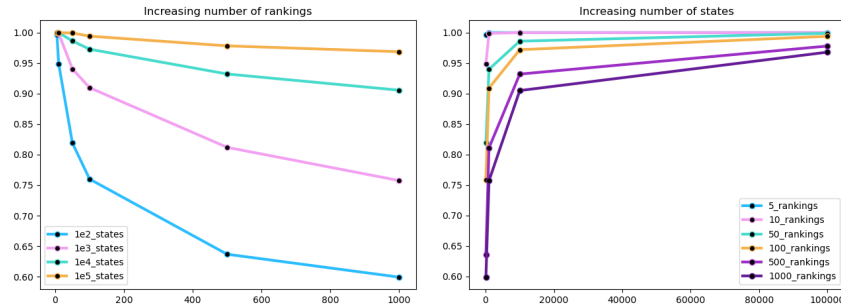

Figure 13: Increasing the state size of the domain increases the rank consistency afforded by  $SL_k$  and increasing the number of rankings decreases the rank consistency.

974 Figure 13 shows that with large state spaces  $SL_k$  is almost rank preserving and the rank preserving  
 975 ability degrades with increasing number of rankings to be satisfied.

## 976 D.7 Stackelberg game design

977 We consider the sensitivity of the two-player game with respect to policy update iterations and reward  
 978 update iterations. Our results (Figure 14) draw analogous conclusions to [51] where we find that  
 979 using a validation loss for training reward function on on-policy and aggregate dataset in PAL and  
 980 RAL respectively works best. Despite its good performance, validation loss based training can be  
 981 wall-clock inefficient. We found a substitute method to perform similarly while giving improvements  
 982 in wall-clock time - make number of iterations of reward learning scale proportionally to the dataset  
 983 set size. A proportionality constant of  $(1/\text{batch-size})$  worked as well as validation loss in practice.



984 Contrary to [51] where the policy is updated by obtaining policy visitation samples from the learned  
 985 model, our ability to increase the policy update is hindered due to unavailability of a learned model  
 986 and requires costly real-environment interactions. We tune the policy iteration parameter (Figure 15)  
 987 and observe the increasing the number of policy updates can hinder learning performance.

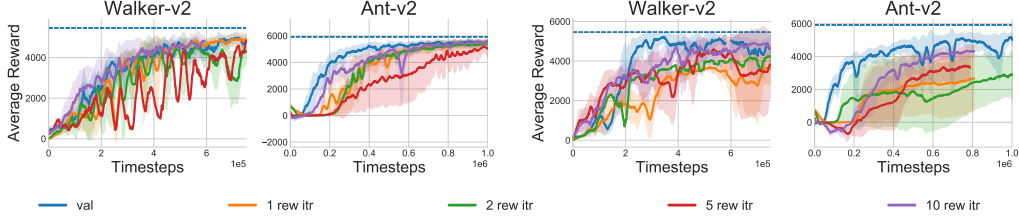

Figure 14: The left two plots use PAL strategy and the right two plots use RAL strategy. Reward learning using a validation loss on a holdout set leads to improved learning performance compared to hand designed reward learning iterations.

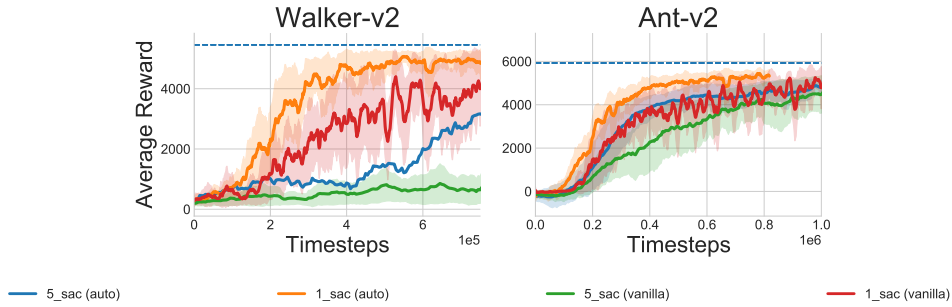

Figure 15: Small number of policy updates are useful for good learning performance in the PAL setting here.

## 988 D.8 Sensitivity of reward range for the ranking loss $L_k$

989 In Section 4.2, we discussed how the scale of learned reward function can have an effect on learning  
 990 performance. We validate the hypothesis here, where we set  $R_{max} = k$  and test the learning  
 991 performance of RANK-PAL (auto) on various different values of  $k$ . Our results in figure D.9 show  
 992 that the hyperparameter  $k$  has a large effect on learning performance and intermediate values of  $k$   
 993 works well with  $k = 10$  performing the best.

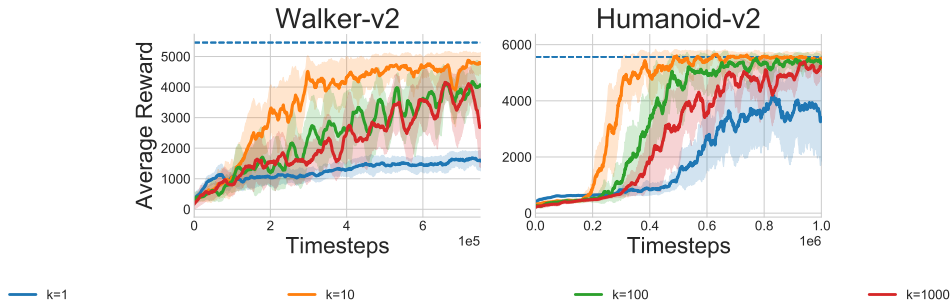

Figure 16: Intermediate values of  $k$  work best in practice.

## 994 D.9 Effect of regularizer for rank-game

995 rank-game(auto) incorporates automatically generated rankings which can be understood as a  
 996 form of regularization, particularly mixup [68] in trajectory space. In this experiment, we work in the  
 997 PAL setting with ranking loss  $L_k$  and compare the performances of other regularizers: Weight-decay  
 998 (wd), Spectral normalization (sn), state-based mixup to (auto). Contrary to trajectory based mixup  
 999 (auto) where we interpolate trajectories, in state-based mixup we sample states randomly from the  
 1000 behaviors which are pairwise ranked and interpolate between them.



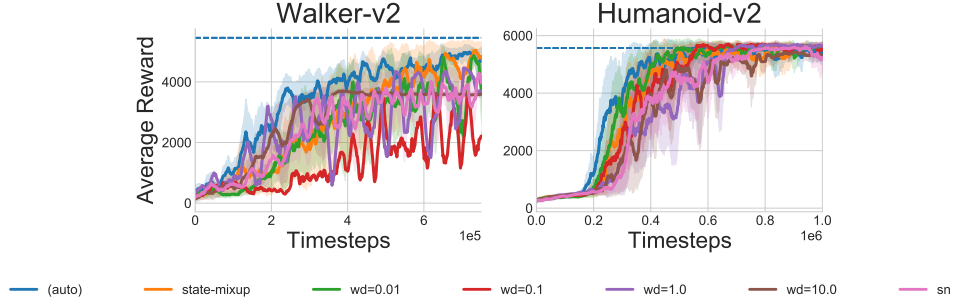

Figure 17: (auto) regularization outperforms other forms of regularization in rank-game

Figure 17 shows learning with (auto) regularizer is more efficient and stable compared to other regularizers.

#### D.10 Ablation analysis summary

We have ablated the following components for our method: Automatically-generated rankings D.3, Ranking loss D.4, Parameterized reward shaping D.5, Stackelberg game design D.7 and range of the bounded reward D.9. Our analysis above (Figure 11, 16 and 14) shows quantitatively that the key improvements over baselines are driven by using the proposed ranking loss, controlling the reward range and the reward/policy update frequency in the Stackelberg framework. Parameterized reward shaping (best hyperparameter :  $\exp -1$  compare to unshaped/linear shaping) and automatically-generated rankings contribute to relatively small improvements. We note that a *single hyperparameter* combination (Table 5) works well across all tasks demonstrating robustness of the method to environment changes.

#### D.11 Varying number of expert trajectories for imitation learning

In the main text, we considered experiment settings where the agent is provided with only 1 expert trajectory. In this section, we test how our methods performs compared to baselines as we increase the number of available expert observation trajectories. We note that these experiments are in the LfO setting. Figure 19 shows that RANK-GAME compares favorably to other methods for varying number of expert demonstrations/observations trajectories.

#### D.12 Robustness to noisy preferences

In this section, we investigate the effect of noisy preferences on imitation learning. We consider the setting of Section 5.2 where we attempt to solve hard exploration problems for LfO setting by leveraging trajectory snippet comparisons. In this experiment, we consider a setting similar to [10] where we inject varying level of noise, i.e flip  $x\%$  of trajectory snippet at random. Figure 18 shows that RANK-PAL(pref) is robust in learning near-expert behavior upto 60 percent noise in the Door environment. We hypothesize that this robustness to noise is possible because the preferences are only used to shape reward functions and does not change the optimality of expert.

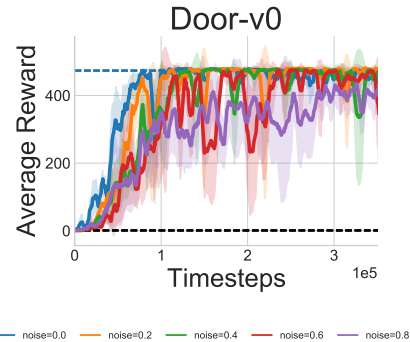

Figure 18: We investigate learning from expert observation+offline preferences where the offline preferences are noisy. RANK-PAL shows considerable robustness to noisy preferences.

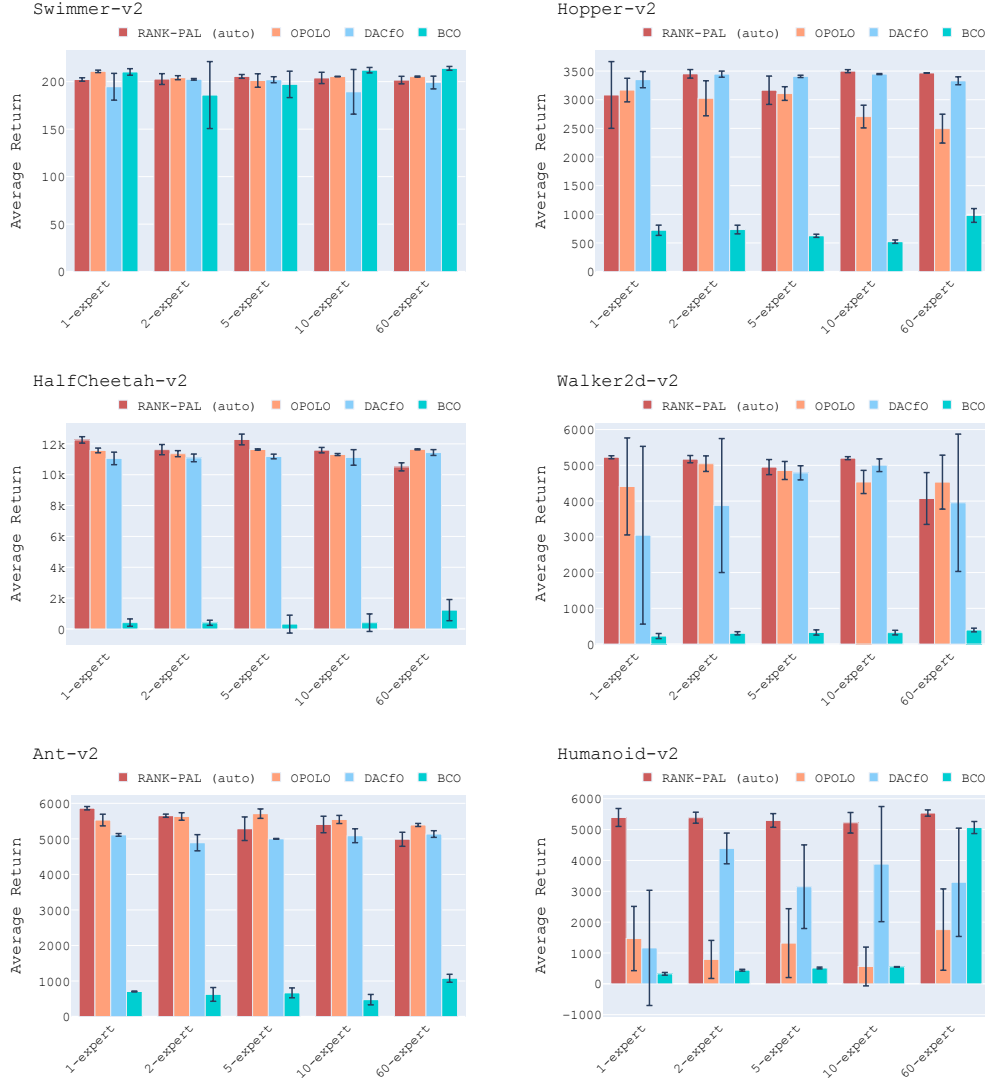

Figure 19: Performance analysis of different algorithms in the LfO setting with varying number of expert trajectories. RANK-PAL (auto) compares favorably to other methods

### 1035 D.13 Learning purely from offline rankings in manipulation environments

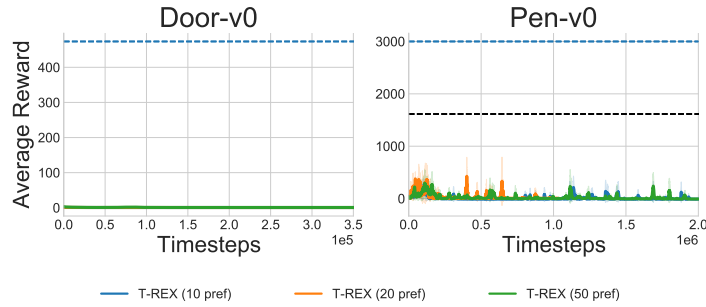

Figure 20: Testing with 10, 20 and 50 suboptimal preferences uniformly sampled from a replay buffer of SAC trained from pre-specified reward we see that TREX is not able to solve these tasks. The black dotted line shows asymptotic performance of RANK-PAL (auto) method.

1036 In section 5.2, we saw that offline annotated preferences can help solve complex manipulation tasks  
1037 via imitation. Now, we compare with the ability of a prior method—TREX [10] that learns purely  
1038 from suboptimal preferences—under increasing numbers of preferences. We test on two manipulation  
1039 tasks: Pen-v0 and Door-v0 given varying number of suboptimal preferences: 10, 20, 50. These  
1040 preferences are uniformly sampled from a replay buffer of SAC trained until convergence under a  
1041 pre-specified reward, obtained via D4RL (licensed under CC BY) .We observe in Figure 20 that  
1042 T-REX is unable to solve these tasks under any selected number of suboptimal preferences.
